# Supplementary material for: Cellular senescence-related gene signature as a valuable predictor of prognosis in hepatocellular carcinoma
Source: publisher site journal article supplement (doi:10.18632/aging.204658), 2023-04-13
Supplement: Supplementary file [file aging-v15i8-204658-supplementary-material-SD2.pdf]

**Supplementary Table 1. Clinical information of patients in the TCGA-LIHC and HCCDB18 datasets.**

| <b>Variable</b>  | <b>TCGA-LIHC</b> | <b>HCCDB18</b> |
|------------------|------------------|----------------|
| Gender           |                  |                |
| Male/Female      | 255/122          | 192/68         |
| Age at diagnosis |                  |                |
| ≤65/>65/NA       | 235/141/1        | 98/162         |
| Grade            |                  |                |
| G1/G2/G3/G4/NA   | 55/180/124/13/5  | NA             |
| Stage            |                  |                |
| I/II/III/IV/NA   | 175/87/86/5/24   | 40/117/80/23   |
| T                |                  |                |
| T1/T2/T3/T4/NA   | 185/95/81/13/3   | NA             |
| M                |                  |                |
| M0/M1/NA         | 272/4/101        | NA             |
| N                |                  |                |
| N0/N1/NA         | 257/4/116        | NA             |
