# Supplementary material for: Cellular senescence-related gene signature as a valuable predictor of prognosis in hepatocellular carcinoma
Source: publisher site journal article supplement (doi:10.18632/aging.204658), 2023-04-13
Supplement: Supplementary file [file aging-v15i8-204658-supplementary-material-SD4.pdf]

**Supplementary Table 3. Samples information of GSE45267 dataset.**

| <b>Sample</b> | <b>Type</b> | <b>Age</b> |
|---------------|-------------|------------|
| GSM1100370    | Tumor       | 48         |
| GSM1100371    | Tumor       | 41         |
| GSM1100372    | Tumor       | 67         |
| GSM1100373    | Tumor       | 41         |
| GSM1100374    | Tumor       | 53         |
| GSM1100375    | Tumor       | 47         |
| GSM1100376    | Tumor       | 57         |
| GSM1100377    | Tumor       | 51         |
| GSM1100378    | Tumor       | 57         |
| GSM1100379    | Tumor       | 60         |
| GSM1100380    | Tumor       | 57         |
| GSM1100381    | Tumor       | 55         |
| GSM1100382    | Normal      | 41         |
| GSM1100383    | Normal      | 41         |
| GSM1100384    | Normal      | 41         |
| GSM1100385    | Normal      | 51         |
| GSM1100386    | Normal      | 57         |
| GSM1100387    | Normal      | 60         |
| GSM1100388    | Normal      | 57         |
| GSM1100389    | Normal      | 68         |
| GSM1100390    | Normal      | 63         |
| GSM1100391    | Normal      | 63         |
| GSM1100392    | Normal      | 67         |
| GSM1100393    | Normal      | 68         |
| GSM1100394    | Normal      | 64         |
| GSM1100395    | Normal      | 50         |
| GSM1100396    | Normal      | 68         |
| GSM1100397    | Normal      | 51         |
| GSM1100398    | Normal      | 62         |
| GSM1100399    | Normal      | 61         |
| GSM1100400    | Normal      | 74         |
| GSM1100401    | Normal      | 46         |
| GSM1100402    | Normal      | 68         |
| GSM1100403    | Normal      | 56         |
| GSM1100404    | Normal      | 51         |
| GSM1100405    | Normal      | 51         |
| GSM1100406    | Tumor       | 43         |
| GSM1100407    | Tumor       | 62         |
| GSM1100408    | Tumor       | 51         |
| GSM1100409    | Tumor       | 68         |
| GSM1100410    | Tumor       | 63         |
| GSM1100411    | Tumor       | 68         |
| GSM1100412    | Tumor       | 64         |
| GSM1100413    | Tumor       | 41         |
| GSM1100414    | Tumor       | 52         |
| GSM1100415    | Tumor       | 50         |
| GSM1100416    | Tumor       | 68         |

|            |        |    |
|------------|--------|----|
| GSM1100417 | Tumor  | 62 |
| GSM1100418 | Tumor  | 61 |
| GSM1100419 | Tumor  | 52 |
| GSM1100420 | Tumor  | 73 |
| GSM1100421 | Tumor  | 61 |
| GSM1100422 | Tumor  | 46 |
| GSM1100423 | Tumor  | 65 |
| GSM1100424 | Tumor  | 68 |
| GSM1100425 | Tumor  | 51 |
| GSM1100426 | Tumor  | 28 |
| GSM1100427 | Tumor  | 30 |
| GSM1100428 | Tumor  | 33 |
| GSM1100429 | Tumor  | 36 |
| GSM1100430 | Tumor  | 26 |
| GSM1100431 | Tumor  | 39 |
| GSM1100432 | Normal | 38 |
| GSM1100433 | Normal | 28 |
| GSM1100434 | Normal | 37 |
| GSM1100435 | Normal | 37 |
| GSM1100436 | Normal | 28 |
| GSM1100437 | Normal | 36 |
| GSM1100438 | Normal | 36 |
| GSM1100439 | Normal | 37 |
| GSM1100440 | Normal | 31 |
| GSM1100441 | Normal | 30 |
| GSM1100442 | Normal | 33 |
| GSM1100443 | Normal | 32 |
| GSM1100444 | Normal | 36 |
| GSM1100445 | Normal | 37 |
| GSM1100446 | Normal | 32 |
| GSM1100447 | Tumor  | 37 |
| GSM1100448 | Tumor  | 31 |
| GSM1100449 | Tumor  | 36 |
| GSM1100450 | Tumor  | 37 |
| GSM1100451 | Tumor  | 34 |
| GSM1100452 | Tumor  | 33 |
| GSM1100453 | Tumor  | 32 |
| GSM1100454 | Tumor  | 37 |
| GSM1100455 | Tumor  | 38 |
| GSM1100456 | Tumor  | 40 |

---
