# Supplementary material for: Cellular senescence-related gene signature as a valuable predictor of prognosis in hepatocellular carcinoma
Source: publisher site journal article supplement (doi:10.18632/aging.204658), 2023-04-13
Supplement: Supplementary file [file aging-v15i8-204658-supplementary-material-SD10.pdf]

**Supplementary Table 9. The immune responses in low- and high-risk groups.**

| <b>Immunological response</b>                | <b>Model</b>     | <b>P-value</b>        | <b>Correlation coefficient</b> |
|----------------------------------------------|------------------|-----------------------|--------------------------------|
| B cell_TIMER                                 | Senescence Score | 0.0000202702295798352 | 0.258373290755954              |
| T cell CD4+_TIMER                            | Senescence Score | 0.000108400568341618  | 0.276193355263645              |
| Neutrophil_TIMER                             | Senescence Score | 4.29428339298687E-08  | 0.359266872808306              |
| Macrophage_TIMER                             | Senescence Score | 7.36486902728179E-09  | 0.362765093078553              |
| Myeloid dendritic cell_TIMER                 | Senescence Score | 5.76044404685146E-07  | 0.338784817248774              |
| B cell memory_CIBERSORT                      | Senescence Score | 0.0378522902508948    | 0.112089355993383              |
| T cell CD4+ memory resting_CIBERSORT         | Senescence Score | 0.0175612750770366    | -0.128923578822784             |
| T cell CD4+ memory activated_CIBERSORT       | Senescence Score | 0.0233864281546951    | 0.147743753544652              |
| T cell follicular helper_CIBERSORT           | Senescence Score | 0.0200831092012567    | 0.136804131490506              |
| T cell regulatory (Tregs)_CIBERSORT          | Senescence Score | 0.000801931929368885  | 0.197993745095327              |
| NK cell resting_CIBERSORT                    | Senescence Score | 0.0439073636948704    | -0.140285865065209             |
| Monocyte_CIBERSORT                           | Senescence Score | 0.020956636507953     | -0.227470384720351             |
| Macrophage M0_CIBERSORT                      | Senescence Score | 0.0000325616513527694 | 0.262960455627498              |
| Neutrophil_CIBERSORT                         | Senescence Score | 0.00557075957224343   | -0.132177142557853             |
| B cell memory_CIBERSORT-ABS                  | Senescence Score | 0.0241246554160234    | 0.132131610961948              |
| B cell plasma_CIBERSORT-ABS                  | Senescence Score | 0.0208314473996641    | 0.125737390349023              |
| T cell CD4+ memory activated_CIBERSORT-ABS   | Senescence Score | 0.0212610117613799    | 0.143284248953572              |
| T cell follicular helper_CIBERSORT-ABS       | Senescence Score | 0.0000507802656797722 | 0.155706743376464              |
| T cell regulatory (Tregs)_CIBERSORT-ABS      | Senescence Score | 4.17710717662559E-07  | 0.15061580904037               |
| NK cell activated_CIBERSORT-ABS              | Senescence Score | 0.000554593464978019  | 0.257548166634541              |
| Macrophage M0_CIBERSORT-ABS                  | Senescence Score | 9.65177541381699E-08  | 0.329426496419035              |
| Macrophage M1_CIBERSORT-ABS                  | Senescence Score | 0.0130128009570688    | -0.12552569328725              |
| Macrophage M2_CIBERSORT-ABS                  | Senescence Score | 0.0000150217615593861 | 0.222457927373238              |
| Myeloid dendritic cell resting_CIBERSORT-ABS | Senescence Score | 0.0241178289648506    | 0.339560040235058              |
| Neutrophil_CIBERSORT-ABS                     | Senescence Score | 0.00124200448640288   | 0.192751394140667              |
| B cell_QUANTISEQ                             | Senescence Score | 0.0000643869176409429 | 0.276161027384921              |
| Macrophage M1_QUANTISEQ                      | Senescence Score | 0.00337453681854056   | 0.1598896783221                |
| Monocyte_QUANTISEQ                           | Senescence Score | 0.0000231614083032618 | 0.108902626217504              |
| T cell CD8+_QUANTISEQ                        | Senescence Score | 0.00199222518193981   | 0.16571989414694               |
| T cell regulatory (Tregs)_QUANTISEQ          | Senescence Score | 0.000286306833010126  | 0.27318618309581               |
| T cell_MCPCOUNTER                            | Senescence Score | 0.000119493212173534  | 0.238465792530489              |
| NK cell_MCPCOUNTER                           | Senescence Score | 0.0422062311358533    | 0.116740419271637              |
| B cell_MCPCOUNTER                            | Senescence Score | 0.00145059540981016   | 0.251447153246182              |
| Monocyte_MCPCOUNTER                          | Senescence Score | 2.77700216856047E-07  | 0.221234849725056              |
| Macrophage/Monocyte_MCPCOUNTER               | Senescence Score | 2.77700216856047E-07  | 0.271456621431428              |
| Myeloid dendritic cell_MCPCOUNTER            | Senescence Score | 0.0045805073001399    | 0.292025625396387              |
| Cancer associated fibroblast_MCPCOUNTER      | Senescence Score | 0.0425087936013699    | 0.15507511636032               |
| B cell_XCELL                                 | Senescence Score | 0.0000608363256432314 | 0.120319182277413              |
| T cell CD4+ memory_XCELL                     | Senescence Score | 0.000555083730584137  | 0.230720862339996              |
| T cell CD4+ central memory_XCELL             | Senescence Score | 0.0248439449331524    | 0.337129925991368              |
| T cell CD8+ naive_XCELL                      | Senescence Score | 0.00634942257844814   | 0.337129925991368              |
| Class-switched memory B cell_XCELL           | Senescence Score | 0.0041932350457448    | 0.22906769852649               |

|                                       |                  |                       |                    |
|---------------------------------------|------------------|-----------------------|--------------------|
| Common lymphoid progenitor_XCELL      | Senescence Score | 8.21845778024016E-11  | 0.152585860131335  |
| Common myeloid progenitor_XCELL       | Senescence Score | 0.0465844913423528    | 0.213402788168852  |
| Endothelial cell_XCELL                | Senescence Score | 1.87407397993098E-13  | 0.237835606872808  |
| Granulocyte-monocyte progenitor_XCELL | Senescence Score | 0.0156335953980959    | -0.142477250025859 |
| Hematopoietic stem cell_XCELL         | Senescence Score | 2.33714682908975E-08  | -0.171024757884418 |
| Macrophage M2_XCELL                   | Senescence Score | 0.000704581626806011  | 0.373384278942444  |
| Monocyte_XCELL                        | Senescence Score | 0.0136449770828341    | -0.130356009928635 |
| B cell naive_XCELL                    | Senescence Score | 0.0429814835103456    | -0.445954313045994 |
| T cell gamma delta_XCELL              | Senescence Score | 0.0222387582939616    | -0.160291337446559 |
| T cell CD4+ Th2_XCELL                 | Senescence Score | 1.57099602617734E-13  | -0.352018615036676 |
| Stroma score_XCELL                    | Senescence Score | 1.03853480503691E-09  | 0.121120459501573  |
| Microenvironment score_XCELL          | Senescence Score | 0.0181827404380113    | -0.177367742413254 |
| B cell_EPIC                           | Senescence Score | 0.0341078893148881    | -0.115437672590154 |
| Cancer associated fibroblast_EPIC     | Senescence Score | 0.0000465336670014947 | 0.266462663767851  |
| Macrophage_EPIC                       | Senescence Score | 7.06005744729839E-12  | -0.405241805129521 |

---
