# Supplementary material for: Cellular senescence-related gene signature as a valuable predictor of prognosis in hepatocellular carcinoma
Source: Aging (Albany NY). 2023 Apr 13;15(8):3064–93. doi: 10.18632/aging.204658 (PMC10188344; doi:10.18632/aging.204658)
Supplement: Supplementary Table 2 [file aging-15-204658-s003.xlsx]

## Sheet: Table S2
Supplementary Table 2. Samples information of GSE121248 dataset.
GSE121248
Sample	Type	Gender	Age
GSM3428716	Tumor sample	Male	72
GSM3428717	Tumor sample	Male	39
GSM3428718	Tumor sample	Male	63
GSM3428719	Tumor sample	Male	44
GSM3428720	Tumor sample	Male	43
GSM3428721	Tumor sample	Male	38
GSM3428722	Tumor sample	Male	47
GSM3428723	Tumor sample	Female	74
GSM3428724	Tumor sample	Male	75
GSM3428725	Tumor sample	Female	58
GSM3428726	Tumor sample	Male	55
GSM3428727	Tumor sample	Male	51
GSM3428728	Tumor sample	Male	51
GSM3428729	Tumor sample	Male	67
GSM3428730	Tumor sample	Male	66
GSM3428731	Tumor sample	Male	67
GSM3428732	Tumor sample	Male	76
GSM3428733	Tumor sample	Male	50
GSM3428734	Tumor sample	Male	30
GSM3428735	Tumor sample	Male	54
GSM3428736	Tumor sample	Male	33
GSM3428737	Tumor sample	Male	61
GSM3428738	Tumor sample	Male	51
GSM3428739	Tumor sample	Male	38
GSM3428740	Tumor sample	Male	79
GSM3428741	Tumor sample	Male	68
GSM3428742	Tumor sample	Male	59
GSM3428743	Tumor sample	Male	72
GSM3428744	Tumor sample	Male	57
GSM3428745	Tumor sample	Female	52
GSM3428746	Tumor sample	Male	57
GSM3428747	Tumor sample	Female	35
GSM3428748	Tumor sample	Male	57
GSM3428749	Tumor sample	Male	33
GSM3428750	Tumor sample	Female	60
GSM3428751	Tumor sample	Male	69
GSM3428752	Tumor sample	Male	48
GSM3428753	Tumor sample	Male	75
GSM3428754	Tumor sample	Male	66
GSM3428755	Tumor sample	Male	59
GSM3428756	Tumor sample	Male	44
GSM3428757	Tumor sample	Male	66
GSM3428758	Tumor sample	Male	83
GSM3428759	Tumor sample	Male	64
GSM3428760	Tumor sample	Male	62
GSM3428761	Tumor sample	Male	73
GSM3428762	Tumor sample	Female	72
GSM3428763	Tumor sample	Male	39
GSM3428764	Tumor sample	Male	69
GSM3428765	Tumor sample	Male	35
GSM3428766	Tumor sample	Male	62
GSM3428767	Tumor sample	Male	59
GSM3428768	Tumor sample	Male	64
GSM3428769	Tumor sample	Male	70
GSM3428770	Tumor sample	Male	62
GSM3428771	Tumor sample	Male	56
GSM3428772	Tumor sample	Male	81
GSM3428773	Tumor sample	Male	77
GSM3428774	Tumor sample	Male	72
GSM3428775	Tumor sample	Female	74
GSM3428776	Tumor sample	Female	72
GSM3428777	Tumor sample	Male	64
GSM3428778	Tumor sample	Male	75
GSM3428779	Tumor sample	Male	51
GSM3428780	Tumor sample	Male	56
GSM3428781	Tumor sample	Male	80
GSM3428782	Tumor sample	Male	55
GSM3428783	Tumor sample	Male	52
GSM3428784	Tumor sample	Female	76
GSM3428785	Tumor sample	Male	53
GSM3428786	Adjacent Normal sample	Female	58
GSM3428787	Adjacent Normal sample	Male	51
GSM3428788	Adjacent Normal sample	Male	67
GSM3428789	Adjacent Normal sample	Male	66
GSM3428790	Adjacent Normal sample	Male	67
GSM3428791	Adjacent Normal sample	Male	76
GSM3428792	Adjacent Normal sample	Male	50
GSM3428793	Adjacent Normal sample	Male	30
GSM3428794	Adjacent Normal sample	Male	54
GSM3428795	Adjacent Normal sample	Male	33
GSM3428796	Adjacent Normal sample	Male	61
GSM3428797	Adjacent Normal sample	Male	51
GSM3428798	Adjacent Normal sample	Male	38
GSM3428799	Adjacent Normal sample	Male	79
GSM3428800	Adjacent Normal sample	Male	68
GSM3428801	Adjacent Normal sample	Male	59
GSM3428802	Adjacent Normal sample	Male	72
GSM3428803	Adjacent Normal sample	Male	57
GSM3428804	Adjacent Normal sample	Female	52
GSM3428805	Adjacent Normal sample	Male	57
GSM3428806	Adjacent Normal sample	Female	35
GSM3428807	Adjacent Normal sample	Male	57
GSM3428808	Adjacent Normal sample	Male	62
GSM3428809	Adjacent Normal sample	Male	56
GSM3428810	Adjacent Normal sample	Male	81
GSM3428811	Adjacent Normal sample	Male	77
GSM3428812	Adjacent Normal sample	Male	72
GSM3428813	Adjacent Normal sample	Female	74
GSM3428814	Adjacent Normal sample	Female	72
GSM3428815	Adjacent Normal sample	Male	64
GSM3428816	Adjacent Normal sample	Male	75
GSM3428817	Adjacent Normal sample	Male	51
GSM3428818	Adjacent Normal sample	Male	56
GSM3428819	Adjacent Normal sample	Male	80
GSM3428820	Adjacent Normal sample	Male	55
GSM3428821	Adjacent Normal sample	Male	52
GSM3428822	Adjacent Normal sample	Female	76
