# Supplementary material for: Cellular senescence-related gene signature as a valuable predictor of prognosis in hepatocellular carcinoma
Source: Aging (Albany NY). 2023 Apr 13;15(8):3064–93. doi: 10.18632/aging.204658 (PMC10188344; doi:10.18632/aging.204658)
Supplement: Supplementary Table 4 [file aging-15-204658-s005.xlsx]

## Sheet: Table S4
Supplementary Table 4. Samples information of GTEx dataset.
GTEx
Sample	Site
GTEX-1399R-1226-SM-5P9GF	Liver
GTEX-YECK-1926-SM-4W21H	Liver
GTEX-13FTZ-0726-SM-5IFFY	Liver
GTEX-11NUK-1226-SM-5P9GM	Liver
GTEX-1399T-0826-SM-5IFES	Liver
GTEX-ZAB5-0426-SM-5CVMI	Liver
GTEX-T6MN-1226-SM-3NMA5	Liver
GTEX-139TS-1426-SM-5IFJD	Liver
GTEX-11WQC-0726-SM-5EQMR	Liver
GTEX-SJXC-1226-SM-4DM78	Liver
GTEX-13VXU-0926-SM-5IFFH	Liver
GTEX-11NV4-1326-SM-5HL6V	Liver
GTEX-145LU-1326-SM-5LU9N	Liver
GTEX-ZEX8-0826-SM-4WKHK	Liver
GTEX-13OW6-2626-SM-5IFF2	Liver
GTEX-ZPU1-0826-SM-57WG2	Liver
GTEX-RWSA-1426-SM-47JXA	Liver
GTEX-13FLV-0326-SM-5N9DJ	Liver
GTEX-13112-1426-SM-5EGH8	Liver
GTEX-11OF3-0726-SM-5BC4Z	Liver
GTEX-147JS-1126-SM-5RQIW	Liver
GTEX-12WSM-0726-SM-5GCOW	Liver
GTEX-11ZUS-2526-SM-59872	Liver
GTEX-1212Z-0226-SM-59HLF	Liver
GTEX-QEG4-1826-SM-4R1JN	Liver
GTEX-S33H-1626-SM-4AD68	Liver
GTEX-11DXY-0526-SM-5EGGQ	Liver
GTEX-ZYT6-0626-SM-5E45V	Liver
GTEX-139UC-1426-SM-5IJGH	Liver
GTEX-13NYB-1026-SM-5IFH3	Liver
GTEX-XOTO-0826-SM-4B65O	Liver
GTEX-11DXZ-0126-SM-5EGGY	Liver
GTEX-XBEC-1526-SM-4AT68	Liver
GTEX-139TU-0826-SM-5IJFG	Liver
GTEX-WY7C-0726-SM-4ONCB	Liver
GTEX-12WSI-0226-SM-5GCNA	Liver
GTEX-WZTO-0626-SM-4PQYY	Liver
GTEX-11EQ9-0526-SM-5A5JZ	Liver
GTEX-131XH-0626-SM-5LZWH	Liver
GTEX-12ZZZ-1326-SM-59HKW	Liver
GTEX-12KS4-1326-SM-5LUB3	Liver
GTEX-13NZB-0626-SM-5IFH6	Liver
GTEX-RN64-1826-SM-48FDV	Liver
GTEX-14753-1626-SM-5NQ9L	Liver
GTEX-WFON-1726-SM-4LVMQ	Liver
GTEX-13PVQ-1526-SM-5IFEQ	Liver
GTEX-VUSG-0126-SM-4KL1X	Liver
GTEX-P44G-1126-SM-3NM9D	Liver
GTEX-13FTW-1126-SM-5J2NV	Liver
GTEX-YB5E-0326-SM-5IFHU	Liver
GTEX-14E1K-0326-SM-5S2PE	Liver
GTEX-147F4-1426-SM-5LUA8	Liver
GTEX-RM2N-1926-SM-48FCU	Liver
GTEX-OOBJ-0826-SM-3NB2K	Liver
GTEX-UTHO-2426-SM-4JBHD	Liver
GTEX-139YR-0226-SM-5IFEM	Liver
GTEX-11UD2-1626-SM-5EQM3	Liver
GTEX-Z9EW-0426-SM-5CVM9	Liver
GTEX-ZVP2-0626-SM-51MSO	Liver
GTEX-ZAB4-0826-SM-5LU9D	Liver
GTEX-11TUW-1726-SM-5BC5C	Liver
GTEX-U8XE-1526-SM-4E3HT	Liver
GTEX-XXEK-1126-SM-4BRUX	Liver
GTEX-12WSL-0226-SM-5CVMJ	Liver
GTEX-12696-0826-SM-5EGGE	Liver
GTEX-1192X-1026-SM-5H12P	Liver
GTEX-WQUQ-1926-SM-4OOSA	Liver
GTEX-O5YT-0826-SM-3TW8N	Liver
GTEX-X261-1726-SM-4PQYT	Liver
GTEX-X4XY-1626-SM-46MVN	Liver
GTEX-11TT1-1726-SM-5EQLJ	Liver
GTEX-13NZ9-1326-SM-5MR3V	Liver
GTEX-144GM-1326-SM-5LU5E	Liver
GTEX-131XE-0326-SM-5LZVO	Liver
GTEX-14C38-1526-SM-5RQJ7	Liver
GTEX-1497J-0726-SM-5Q5D1	Liver
GTEX-QDVN-0826-SM-48TZ2	Liver
GTEX-11ZTS-1426-SM-5EQMM	Liver
GTEX-Y5V5-0926-SM-4VBPZ	Liver
GTEX-Q2AG-1126-SM-48U1P	Liver
GTEX-P78B-1326-SM-3P611	Liver
GTEX-WYVS-1926-SM-4PQZ2	Liver
GTEX-UPIC-0926-SM-4IHLV	Liver
GTEX-RNOR-1426-SM-48FDJ	Liver
GTEX-ZF2S-3026-SM-4WWCH	Liver
GTEX-ZVT3-1626-SM-5GU66	Liver
GTEX-131YS-1626-SM-5HL6C	Liver
GTEX-11ZVC-0726-SM-5FQT9	Liver
GTEX-YFC4-1526-SM-5IFJS	Liver
GTEX-ZVT4-0626-SM-5E45T	Liver
GTEX-WYVS-1926-SM-4SOIC	Liver
GTEX-13SLX-1226-SM-5S2Q6	Liver
GTEX-ZZPU-0426-SM-5GZYH	Liver
GTEX-1269C-0626-SM-5FQSS	Liver
GTEX-ZF29-2026-SM-4WWB7	Liver
GTEX-RU72-1426-SM-46MUF	Liver
GTEX-13O3O-1826-SM-5IFGW	Liver
GTEX-14A5I-1726-SM-5QGQ5	Liver
GTEX-13QJC-0726-SM-5RQJK	Liver
GTEX-Y5LM-0426-SM-4VBRO	Liver
GTEX-RTLS-1326-SM-46MUN	Liver
GTEX-13113-1326-SM-5GCOI	Liver
GTEX-X4EP-1026-SM-4QAS5	Liver
GTEX-13OVJ-1026-SM-5IFGI	Liver
GTEX-13PVR-0126-SM-5S2PY	Liver
GTEX-13N11-0926-SM-5IJG2	Liver
GTEX-ZYY3-0626-SM-5NQ6W	Liver
GTEX-ZTPG-1426-SM-51MT3	Liver
GTEX-132AR-0426-SM-5IFH8	Liver
GTEX-S32W-1926-SM-4AD63	Liver
