# Supplementary material for: Cellular senescence-related gene signature as a valuable predictor of prognosis in hepatocellular carcinoma
Source: Aging (Albany NY). 2023 Apr 13;15(8):3064–93. doi: 10.18632/aging.204658 (PMC10188344; doi:10.18632/aging.204658)
Supplement: Supplementary Table 5 [file aging-15-204658-s006.xlsx]

## Sheet: Table S5
Supplementary Table 5. A brief description of 1582 cellular senescence-related genes set.
Source	Standard gene set name	Brief description	Collection	Link
Molecular Signatures Database	COURTOIS_SENESCENCE_TRIGGERS	Genes that trigger senescence in vitro and in vivo.	C2_CGP: Archived chemical and genetic perturbations	http://www.gsea-msigdb.org/gsea/msigdb/human/geneset/COURTOIS_SENESCENCE_TRIGGERS.html?keywords=COURTOIS_SENESCENCE_TRIGGERS
	FRIDMAN_SENESCENCE_DN	Genes down-regulated in senescent cells	C2: curated gene sets	http://www.gsea-msigdb.org/gsea/msigdb/human/geneset/FRIDMAN_SENESCENCE_DN.html?keywords=FRIDMAN_SENESCENCE_DN
	FRIDMAN_SENESCENCE_UP	Genes up-regulated in senescent cells	C2: curated gene sets	http://www.gsea-msigdb.org/gsea/msigdb/human/geneset/FRIDMAN_SENESCENCE_UP.html?keywords=FRIDMAN_SENESCENCE_UP
	GO_CELLULAR_SENESCENCE	A cell aging process stimulated in response to cellular stress, whereby normal cells lose the ability to divide through irreversible cell cycle arrest	C5: GO gene sets	http://amigo.geneontology.org/amigo/term/GO:0090398
	GO_NEGATIVE_REGULATION_OF_CELLULAR_SENESCENCE	Any process that stops, prevents or reduces the frequency, rate or extent of cellular senescence	C5: GO gene sets	http://amigo.geneontology.org/amigo/term/GO:2000773
	GO_REPLICATIVE_SENESCENCE	A cell aging process associated with the dismantling of a cell as a response to telomere shortening and/or cellular aging	C5: GO gene sets	http://amigo.geneontology.org/amigo/term/GO:0090399
	GO_STRESS_INDUCED_PREMATURE_SENESCENCE	A cellular senescence process associated with the dismantling of a cell as a response to environmental factors such as hydrogen peroxide or X-rays	C5: GO gene sets	http://www.gsea-msigdb.org/gsea/msigdb/human/geneset/GOBP_STRESS_INDUCED_PREMATURE_SENESCENCE.html?keywords=SENESCENCE
	REACTOME_CELLULAR_SENESCENCE	Cellular Senescence	C2: curated gene sets	http://www.gsea-msigdb.org/gsea/msigdb/human/geneset/REACTOME_CELLULAR_SENESCENCE.html?keywords=REACTOME_CELLULAR_SENESCENCE
	REACTOME_DNA_DAMAGE_TELOMERE_STRESS_INDUCED_SENESCENCE	DNA Damage/Telomere Stress Induced Senescence	C2: curated gene sets	http://www.gsea-msigdb.org/gsea/msigdb/human/geneset/REACTOME_DNA_DAMAGE_TELOMERE_STRESS_INDUCED_SENESCENCE.html?keywords=REACTOME_DNA_DAMAGE_TELOMERE_STRESS_INDUCED_SENESCENCE
	REACTOME_FORMATION_OF_SENESCENCE_ASSOCIATED_HETEROCHROMATIN_FOCI_SAHF	Formation of Senescence-Associated Heterochromatin Foci (SAHF)	C2: curated gene sets	http://www.gsea-msigdb.org/gsea/msigdb/human/geneset/REACTOME_FORMATION_OF_SENESCENCE_ASSOCIATED_HETEROCHROMATIN_FOCI_SAHF.html?keywords=REACTOME_FORMATION_OF_SENESCENCE_ASSOCIATED_HETEROCHROMATIN_FOCI_SAHF
	REACTOME_ONCOGENE_INDUCED_SENESCENCE	Oncogene Induced Senescence	C2: curated gene sets	http://www.gsea-msigdb.org/gsea/msigdb/human/geneset/REACTOME_ONCOGENE_INDUCED_SENESCENCE.html?keywords=REACTOME_ONCOGENE_INDUCED_SENESCENCE
	REACTOME_OXIDATIVE_STRESS_INDUCED_SENESCENCE	Oxidative Stress Induced Senescence	C2: curated gene sets	http://www.gsea-msigdb.org/gsea/msigdb/human/geneset/REACTOME_OXIDATIVE_STRESS_INDUCED_SENESCENCE.html?keywords=REACTOME_OXIDATIVE_STRESS_INDUCED_SENESCENCE
	REACTOME_SENESCENCE_ASSOCIATED_SECRETORY_PHENOTYPE_SASP	Senescence-Associated Secretory Phenotype (SASP)	C2: curated gene sets	http://www.gsea-msigdb.org/gsea/msigdb/human/geneset/REACTOME_SENESCENCE_ASSOCIATED_SECRETORY_PHENOTYPE_SASP.html?keywords=REACTOME_SENESCENCE_ASSOCIATED_SECRETORY_PHENOTYPE_SASP
	TANG_SENESCENCE_TP53_TARGETS_DN	Genes down-regulated in WI-38 cells (senescent primary fibroblasts) after inactivation of TP53 [GeneID=7157] by GSE56 polypeptide	C2: curated gene sets	http://www.gsea-msigdb.org/gsea/msigdb/human/geneset/TANG_SENESCENCE_TP53_TARGETS_DN.html?keywords=TANG_SENESCENCE_TP53_TARGETS_DN
	TANG_SENESCENCE_TP53_TARGETS_UP	Genes up-regulated in WI-38 cells (senescent primary fibroblasts) after inactivation of TP53 [GeneID=7157] by GSE56 polypeptide	C2: curated gene sets	http://www.gsea-msigdb.org/gsea/msigdb/human/geneset/TANG_SENESCENCE_TP53_TARGETS_UP.html?keywords=TANG_SENESCENCE_TP53_TARGETS_UP
The Database of Cell Senescence Genes		Based on gene manipulation experiments in different human cell types, a database of cell senescence-associated genes was established by manually-curated data		https://genomics.senescence.info/cells/index.html
