# Supplementary material for: Cellular senescence-related gene signature as a valuable predictor of prognosis in hepatocellular carcinoma
Source: Aging (Albany NY). 2023 Apr 13;15(8):3064–93. doi: 10.18632/aging.204658 (PMC10188344; doi:10.18632/aging.204658)
Supplement: Supplementary Table 6 [file aging-15-204658-s007.xlsx]

## Sheet: Table S6
Supplementary Table 6. Differential expressed cellular senescence-related genes expression profile.
Gene	LogFC	AveExpr	t	P-value	FDR	B
MDK	4.4687	5.60382	28.001	1.02976e-106	3.83586e-104	232.961
CXCL14	-3.01833	1.72077	-26.6804	3.47368e-100	7.39397e-98	217.971
PTTG1	3.15172	3.37443	25.4022	8.0318e-94	1.08794e-91	203.357
UBE2T	2.39845	2.64763	24.3633	1.2636e-88	1.10751e-86	191.424
CCNB1	2.75846	3.11591	23.8837	3.20209e-86	2.27196e-84	185.904
CDKN3	2.69773	2.69898	23.6693	3.80887e-85	2.46749e-83	183.434
CDKN2A	2.92369	2.60904	22.5007	2.78219e-79	1.33725e-77	169.97
UBE2C	2.98261	3.01096	22.4472	5.16439e-79	2.40467e-77	169.353
MND1	1.57703	1.45266	21.773	1.24062e-75	4.86452e-74	161.591
TOP2A	2.69091	2.61996	21.5934	9.84355e-75	3.76074e-73	159.525
CDC20	2.78968	2.60791	21.412	7.97148e-74	2.69943e-72	157.44
CENPW	2.14249	2.63742	21.2364	6.02788e-73	1.91096e-71	155.422
ZWINT	2.24556	2.74262	21.152	1.59329e-72	4.748e-71	154.453
CDK1	2.27923	2.21215	21.1026	2.81295e-72	8.0602e-71	153.886
PRC1	2.26468	2.8751	20.9508	1.61543e-71	4.4574e-70	152.143
CAP2	2.00695	2.67559	20.3491	1.62375e-68	3.90223e-67	145.251
CCNB2	2.10445	1.97896	20.1932	9.70345e-68	2.15793e-66	143.468
KCNN2	-1.77476	1.17326	-20.101	2.79048e-67	6.02583e-66	142.415
CENPM	2.18158	2.15292	20.0604	4.44028e-67	9.45145e-66	141.952
KIFC1	2.08229	1.90524	20.026	6.58095e-67	1.38107e-65	141.56
E2F1	2.16147	2.14162	19.9092	2.50593e-66	4.97844e-65	140.227
CENPF	2.29775	2.12452	19.814	7.44243e-66	1.44016e-64	139.141
COL15A1	1.76897	1.59345	19.739	1.7539e-65	3.35041e-64	138.287
ESM1	1.98451	1.5916	19.6284	6.19528e-65	1.12573e-63	137.029
CDCA5	1.80024	1.81742	19.5336	1.82738e-64	3.16604e-63	135.95
ASPM	1.75239	1.53718	19.4903	2.99684e-64	5.0742e-63	135.457
TROAP	2.29782	2.22544	19.4511	4.68246e-64	7.83918e-63	135.012
BIRC5	2.17443	2.27055	19.3526	1.43908e-63	2.38219e-62	133.893
NEK2	1.84146	1.57772	19.3083	2.38172e-63	3.77528e-62	133.391
AURKA	1.89141	2.57593	19.2555	4.34212e-63	6.6018e-62	132.792
NDC80	1.66497	1.53991	19.1703	1.14463e-62	1.72272e-61	131.826
RACGAP1	1.6796	2.08776	19.0483	4.58014e-62	6.75684e-61	130.444
RRM2	2.24729	2.60576	18.8952	2.60033e-61	3.65518e-60	128.713
MCM2	2.01552	2.44452	18.76	1.2034e-60	1.61538e-59	127.185
PKMYT1	1.86276	2.2696	18.6568	3.87056e-60	5.10366e-59	126.021
CDC25C	1.39266	1.14584	18.6511	4.1271e-60	5.39419e-59	125.957
CDT1	1.74326	1.72723	18.3805	8.77197e-59	1.07133e-57	122.91
PCLAF	2.00967	2.89399	18.3227	1.6824e-58	2.02159e-57	122.261
MAD2L1	1.65016	1.94256	18.1803	8.35568e-58	9.88093e-57	120.664
AURKB	1.93141	2.17294	17.9477	1.13862e-56	1.2567e-55	118.061
TPX2	1.90966	2.33043	17.8774	2.50397e-56	2.74332e-55	117.275
CDCA3	1.8648	2.21702	17.8153	5.02094e-56	5.38216e-55	116.582
NCAPH	1.55769	1.45533	17.8063	5.55223e-56	5.90916e-55	116.482
TCF19	1.74337	1.98313	17.7958	6.24717e-56	6.60162e-55	116.364
NCAPG	1.57573	1.42925	17.7279	1.3349e-55	1.38125e-54	115.608
NUF2	1.66474	1.44512	17.6589	2.88451e-55	2.904e-54	114.84
ASF1B	1.68742	1.74753	17.4982	1.73331e-54	1.67703e-53	113.053
EXO1	1.31618	1.17915	17.4867	1.96955e-54	1.89331e-53	112.925
SPC25	1.36795	1.32188	17.4152	4.36828e-54	4.09355e-53	112.132
KIF20A	1.61498	1.48235	17.4053	4.87369e-54	4.53862e-53	112.023
MKI67	1.6606	1.58192	17.3614	7.94184e-54	7.30453e-53	111.536
MELK	1.53867	1.3961	17.2407	3.03818e-53	2.67863e-52	110.199
KIF4A	1.43852	1.19876	17.1055	1.35881e-52	1.17711e-51	108.707
GINS2	1.26261	1.54198	16.9641	6.49174e-52	5.55902e-51	107.148
CENPA	1.52242	1.32062	16.9599	6.80546e-52	5.79436e-51	107.101
HMMR	1.45872	1.4493	16.8309	2.82498e-51	2.35152e-50	105.683
CDCA8	1.50295	1.55883	16.7842	4.7252e-51	3.88981e-50	105.171
MYBL2	2.13538	1.93339	16.6948	1.2628e-50	1.00619e-49	104.191
DTL	1.47766	1.3851	16.6678	1.69924e-50	1.34673e-49	103.896
RMI2	1.59081	1.87266	16.6644	1.7653e-50	1.39169e-49	103.858
FANCI	1.36118	1.72228	16.638	2.35737e-50	1.82942e-49	103.57
OIP5	1.33251	1.26275	16.6234	2.7677e-50	2.13672e-49	103.41
KIF2C	1.5435	1.43842	16.5543	5.91232e-50	4.49457e-49	102.654
ANLN	1.5339	1.44708	16.5276	7.92275e-50	5.96207e-49	102.362
WDR76	1.25746	1.38094	16.4521	1.80945e-49	1.32812e-48	101.539
BUB1	1.3188	1.20092	16.4427	2.00643e-49	1.46548e-48	101.436
PBK	1.46553	1.361	16.3981	3.26746e-49	2.37488e-48	100.951
CDC45	1.50232	1.65158	16.2449	1.73973e-48	1.24029e-47	99.2847
SKA3	1.08444	0.954991	16.1713	3.88109e-48	2.72774e-47	98.4855
SKA1	1.20143	0.973917	16.1537	4.69897e-48	3.28707e-47	98.295
PARPBP	1.09453	1.09316	16.0701	1.16597e-47	8.043e-47	97.3898
SORT1	1.45626	2.47328	15.8822	8.93079e-47	6.02121e-46	95.3621
DLGAP5	1.24765	1.08158	15.8029	2.104e-46	1.39332e-45	94.5086
HJURP	1.32584	1.40347	15.6362	1.26866e-45	8.21868e-45	92.7193
FOXM1	1.77172	2.25162	15.6058	1.76027e-45	1.12085e-44	92.3932
GINS1	1.25717	1.26718	15.4286	1.17763e-44	7.25068e-44	90.5006
RAD51	1.11157	1.22363	15.359	2.47749e-44	1.50672e-43	89.76
FAM83D	1.41477	2.02691	15.292	5.068e-44	3.05721e-43	89.0474
PRR11	1.17045	1.08471	15.2253	1.03232e-43	6.15265e-43	88.339
CCNA2	1.46653	1.71657	14.8988	3.29216e-42	1.87226e-41	84.892
CDKN2B	1.10918	1.36252	14.8032	9.01644e-42	5.01287e-41	83.8891
BUB1B	1.1866	1.16631	14.6941	2.84093e-41	1.53927e-40	82.7467
TTK	1.11246	0.98307	14.6584	4.13086e-41	2.22202e-40	82.374
ABCA8	-1.70693	2.62352	-14.5823	9.17379e-41	4.89927e-40	81.5799
UHRF1	1.37978	1.30953	14.5704	1.03862e-40	5.52696e-40	81.4563
MT1E	-3.29681	7.24377	-14.4914	2.37118e-40	1.24404e-39	80.6347
TRIP13	1.19882	1.22772	14.4682	3.02111e-40	1.56845e-39	80.3936
RAD51AP1	1.1208	1.26352	14.3104	1.56132e-39	7.93982e-39	78.759
FAM111B	1.14935	1.16384	14.3012	1.71772e-39	8.70547e-39	78.664
ANKRD29	1.31242	1.71109	14.2558	2.75167e-39	1.38047e-38	78.1951
PLK1	1.4949	1.90096	14.2248	3.79422e-39	1.89076e-38	77.8754
CD163L1	1.35461	1.70507	14.1712	6.60269e-39	3.24687e-38	77.3241
ECT2	1.31211	1.78787	14.1024	1.34406e-38	6.52327e-38	76.6168
CENPK	1.04708	1.16889	13.9505	6.41967e-38	3.01745e-37	75.0609
KIF23	1.20097	1.23185	13.7599	4.51404e-37	2.05686e-36	73.1205
APOBEC3B	1.42288	1.48202	13.6566	1.29299e-36	5.8204e-36	72.0736
DEPDC1B	1.21645	1.10122	13.6534	1.33517e-36	5.97419e-36	72.0417
RAD54L	1.05066	1.06557	13.5916	2.49962e-36	1.10191e-35	71.4179
PAQR4	1.34695	2.04797	13.5556	3.602e-36	1.58318e-35	71.0545
FOS	-2.11247	4.83006	-13.3579	2.64996e-35	1.12491e-34	69.0696
ETV4	1.88216	2.00772	12.8072	6.36929e-33	2.43965e-32	63.6186
CXCL10	2.14324	3.11782	12.8053	6.48915e-33	2.47919e-32	63.6
GTSE1	1.01898	1.05644	12.7502	1.11593e-32	4.22012e-32	63.0611
CDC6	1.24164	1.58089	12.6606	2.68539e-32	9.95332e-32	62.1882
ENPP2	1.70763	3.4074	12.4921	1.3899e-31	5.06347e-31	60.5542
CCNE1	1.27659	1.33006	12.3228	7.16154e-31	2.5816e-30	58.925
RBM24	1.05833	1.16318	12.2274	1.79435e-30	6.3355e-30	58.0124
IGSF3	1.06164	1.03981	12.1975	2.39054e-30	8.38096e-30	57.7273
STC1	1.09477	1.53452	11.8994	4.0968e-29	1.38105e-28	54.9048
SCARA3	1.28007	1.95386	11.7582	1.55217e-28	5.1394e-28	53.5819
ELOVL2	1.47868	3.59137	11.1242	5.46713e-26	1.65907e-25	47.7604
HIST1H4H	1.0324	1.18819	11.0193	1.41615e-25	4.17835e-25	46.816
MNS1	1.01326	1.11264	10.2634	1.13643e-22	3.02912e-22	40.1843
TMEM45A	-1.50122	4.06375	-9.47323	8.83958e-20	2.14162e-19	33.5924
RPL39L	1.23937	2.32386	9.00181	3.93319e-18	9.08597e-18	29.8388
SLC1A1	-1.11463	3.12842	-8.55133	1.29868e-16	2.87523e-16	26.3843
SERPINE1	-1.05186	4.84802	-5.77493	1.31022e-08	2.14766e-08	8.29208
