# Supplementary material for: Cellular senescence-related gene signature as a valuable predictor of prognosis in hepatocellular carcinoma
Source: Aging (Albany NY). 2023 Apr 13;15(8):3064–93. doi: 10.18632/aging.204658 (PMC10188344; doi:10.18632/aging.204658)
Supplement: Supplementary Table 7 [file aging-15-204658-s008.xlsx]

## Sheet: Table S7
Supplementary Table 7. The outcomes of univariate and multivariate cox regression analyses for DEGs associated with cellular senescence.
Univariate COX analysis						Multivariate Cox analysis
Gene	HR	HR.95L	HR.95H	P-value		Gene	HR	HR.95L	HR.95H	P-value
PTTG1	1.41603	1.22111	1.64206	4.14954e-06		PTTG1	2.81272	1.583	4.9978	0.000422
UBE2T	1.41623	1.18544	1.69194	0.000125892		CDKN3	0.27133	0.1557	0.473	4.21e-06
CCNB1	1.50334	1.27722	1.7695	9.48629e-07		TOP2A	0.21626	0.1156	0.4046	1.67e-06
CDKN3	1.31146	1.12216	1.5327	0.000651985		CENPW	0.58255	0.3609	0.9403	0.026956
CDKN2A	1.23887	1.07427	1.42869	0.00323038		CCNB2	0.31135	0.1478	0.6561	0.002153
UBE2C	1.32924	1.16652	1.51465	1.93898e-05		CENPF	0.486	0.2532	0.933	0.030133
MND1	1.44756	1.15232	1.81843	0.00148189		CDCA5	0.3541	0.175	0.7166	0.003894
TOP2A	1.30995	1.14543	1.49809	8.04972e-05		NDC80	0.4217	0.1953	0.9107	0.027949
CDC20	1.42951	1.25397	1.62962	9.01778e-08		PKMYT1	0.29018	0.1395	0.6036	0.000929
CENPW	1.39045	1.17431	1.64637	0.000131274		NCAPG	0.38858	0.1659	0.9102	0.029503
ZWINT	1.46542	1.23978	1.73213	7.48638e-06		ASF1B	0.44824	0.2258	0.8897	0.021787
CDK1	1.4581	1.2361	1.71998	7.63977e-06		SPC25	2.75255	1.0046	7.5415	0.048956
PRC1	1.36263	1.14742	1.61819	0.000418862		GINS2	0.59943	0.362	0.9927	0.04675
CCNB2	1.36382	1.15086	1.61619	0.000340923		CENPA	3.01894	1.4538	6.269	0.00304
CENPM	1.35821	1.1669	1.58089	7.72985e-05		HMMR	2.50542	1.3126	4.7821	0.005357
KIFC1	1.44688	1.22837	1.70426	9.76598e-06		CDCA8	3.86952	1.8198	8.228	0.000439
E2F1	1.26743	1.09967	1.46079	0.00106981		BUB1	0.37794	0.1865	0.7661	0.006953
CENPF	1.47048	1.22106	1.77085	4.78264e-05		PBK	2.05871	1.3177	3.2163	0.001513
CDCA5	1.49102	1.24235	1.78946	1.77832e-05		DLGAP5	3.00781	1.3956	6.4826	0.004944
ASPM	1.44267	1.18497	1.7564	0.000261757		HJURP	3.14252	1.4647	6.7425	0.003285
TROAP	1.43834	1.20784	1.71283	4.52111e-05		GINS1	3.92324	1.582	9.7291	0.003179
BIRC5	1.39098	1.20717	1.60278	5.02909e-06		TTK	2.33658	1.0216	5.344	0.044358
NEK2	1.45178	1.21875	1.72936	2.96607e-05		RAD54L	0.33843	0.1373	0.834	0.018548
AURKA	1.31796	1.11961	1.55146	0.000908166		PAQR4	1.60809	1.083	2.3877	0.018501
NDC80	1.74092	1.41488	2.14208	1.60471e-07		ETV4	1.29833	1.1069	1.5229	0.001337
RACGAP1	1.62908	1.32331	2.0055	4.19932e-06		IGSF3	1.32218	1.0176	1.7179	0.036563
RRM2	1.42464	1.20961	1.6779	2.24133e-05
MCM2	1.44451	1.2261	1.70183	1.09757e-05
PKMYT1	1.47273	1.18434	1.83134	0.000498529
CDC25C	1.54349	1.24888	1.90759	5.90265e-05
CDT1	1.4204	1.20218	1.67824	3.73073e-05
MAD2L1	1.60437	1.29461	1.98824	1.5669e-05
AURKB	1.36948	1.16659	1.60766	0.000121342
TPX2	1.52605	1.29902	1.79277	2.70115e-07
CDCA3	1.62039	1.32176	1.98651	3.41733e-06
NCAPH	1.60995	1.29241	2.0055	2.15339e-05
TCF19	1.28465	1.09124	1.51234	0.00262305
NCAPG	1.73319	1.40354	2.14025	3.23034e-07
NUF2	1.53822	1.28554	1.84058	2.55955e-06
ASF1B	1.36454	1.14776	1.62226	0.00042948
EXO1	1.7888	1.39897	2.28724	3.53429e-06
SPC25	1.77088	1.40878	2.22604	9.75514e-07
KIF20A	1.74391	1.43772	2.1153	1.64554e-08
MKI67	1.49926	1.24909	1.79952	1.37404e-05
MELK	1.58025	1.30477	1.91389	2.84219e-06
KIF4A	1.50338	1.26178	1.79123	5.08354e-06
GINS2	1.34061	1.09776	1.63717	0.00404375
CENPA	1.76736	1.45072	2.15311	1.57057e-08
HMMR	1.66404	1.36428	2.02965	5.02856e-07
CDCA8	1.70393	1.41898	2.04612	1.1445e-08
MYBL2	1.32196	1.17473	1.48763	3.60242e-06
DTL	1.38522	1.14394	1.67741	0.000846529
RMI2	1.31701	1.1064	1.5677	0.0019528
FANCI	1.53289	1.20925	1.94314	0.000415136
OIP5	1.42529	1.14254	1.77801	0.00168307
KIF2C	1.65418	1.3894	1.96941	1.55557e-08
ANLN	1.63097	1.35966	1.95642	1.3667e-07
WDR76	1.45293	1.15486	1.82794	0.00142766
BUB1	1.70778	1.37498	2.12113	1.30205e-06
PBK	1.53136	1.28663	1.82264	1.6134e-06
CDC45	1.55781	1.2729	1.90649	1.69708e-05
SKA3	1.77536	1.38831	2.27032	4.7663e-06
SKA1	1.59345	1.31489	1.93101	2.01011e-06
SORT1	1.27279	1.0495	1.54359	0.0142523
DLGAP5	1.74265	1.42335	2.13357	7.50886e-08
HJURP	1.6698	1.37414	2.02906	2.51533e-07
FOXM1	1.43741	1.2143	1.70152	2.48486e-05
GINS1	1.62783	1.33372	1.98681	1.64966e-06
RAD51	1.63218	1.25872	2.11645	0.000219268
FAM83D	1.45365	1.21817	1.73463	3.34307e-05
PRR11	1.84636	1.48108	2.30174	4.97953e-08
CCNA2	1.38426	1.18803	1.6129	3.05918e-05
CDKN2B	1.51276	1.1988	1.90894	0.00048715
BUB1B	1.60426	1.30477	1.97248	7.34797e-06
TTK	1.90807	1.52166	2.39262	2.19408e-08
ABCA8	0.840399	0.724332	0.975064	0.02185
UHRF1	1.48247	1.21173	1.81372	0.000130018
TRIP13	1.72726	1.43281	2.08221	9.95747e-09
RAD51AP1	1.54208	1.23634	1.92344	0.000122222
FAM111B	1.40221	1.14405	1.71864	0.00112899
PLK1	1.62357	1.35191	1.94981	2.13243e-07
ECT2	1.53365	1.27127	1.85018	7.93e-06
CENPK	1.68656	1.26119	2.25541	0.000423719
KIF23	1.64419	1.32927	2.03371	4.56711e-06
DEPDC1B	1.40742	1.182	1.67583	0.000124296
RAD54L	1.63536	1.30387	2.05112	2.08353e-05
PAQR4	1.39806	1.1688	1.67229	0.000245629
ETV4	1.20298	1.07731	1.3433	0.00102783
GTSE1	1.75566	1.40282	2.19726	8.79625e-07
CDC6	1.43506	1.20588	1.70779	4.72515e-05
IGSF3	1.42651	1.21361	1.67675	1.65002e-05
TMEM45A	1.17349	1.047	1.31527	0.00597539
SERPINE1	1.11715	1.01555	1.22891	0.0227714
