# Supplementary material for: Cellular senescence-related gene signature as a valuable predictor of prognosis in hepatocellular carcinoma
Source: Aging (Albany NY). 2023 Apr 13;15(8):3064–93. doi: 10.18632/aging.204658 (PMC10188344; doi:10.18632/aging.204658)
Supplement: Supplementary Table 8 [file aging-15-204658-s009.xlsx]

## Sheet: Table S8
Supplementary Table 8. 19 cellular senescence-related genes signature transcript expression matrix.
Samples	Futime	Fustat	CDCA5	CENPF	CENPW	CDCA8	SPC25	CDKN3	CENPA	BUB1	DLGAP5	IGSF3	HMMR	TOP2A	RAD54L	TTK	GINS1	PTTG1	ETV4	GINS2	PKMYT1	Senescence Score	Risk
TCGA-EP-A26S	1.66575	0	0.994517	0.911945	1.66138	1.21385	0.61678	1.33279	0.38074	0.726961	0.543393	0.143778	1.09836	1.71146	0.448242	0.593741	0.847093	2.00588	3.84352	1.42795	0.739252	0.451827	high
TCGA-DD-AAVX	4.70685	0	0.717157	0.44356	1.5405	0.59709	0.361164	1.09699	0.320568	0.473398	0.397186	0.440914	0.922106	1.04525	0.367604	0.411323	0.477067	1.77244	0.245077	0.604911	0.510692	-0.134922	low
TCGA-ED-A7PZ	0.0164384	0	2.11068	1.39791	3.43218	1.91602	1.41853	3.06171	1.13043	1.27218	1.3486	0.268031	1.72542	2.48997	0.634082	1.2382	1.28479	4.32297	2.84562	2.01671	2.42297	-0.19376	low
TCGA-LG-A6GG	1.06027	0	1.67932	1.32033	2.7541	1.50472	1.10356	2.38287	0.976279	1.33896	1.10884	2.68261	2.24259	2.13023	0.633229	0.920206	0.915811	3.09416	0.592127	1.11599	0.93325	0.760584	high
TCGA-ED-A97K	0.0164384	0	1.97871	2.04074	2.21061	1.80339	1.27916	1.98362	1.33764	1.70281	1.85869	1.98522	2.00666	3.06385	0.919147	0.978721	0.928645	2.84669	3.62275	1.62202	1.8243	0.649056	high
TCGA-DD-AAVW	6.34795	0	1.4801	1.70307	2.67401	1.57458	1.12096	2.86387	1.19507	1.45273	1.45751	1.46073	1.89364	2.54827	0.547176	1.28292	1.22428	2.6594	3.02821	0.888636	1.17771	0.804367	high
TCGA-UB-A7ME	1.33151	0	1.79967	1.47706	2.94215	2.35884	1.36717	3.37784	1.09534	1.43451	1.6017	0.59728	1.63958	2.90269	0.961489	1.59401	2.38993	3.19613	3.78657	2.574	1.3592	0.93461	high
TCGA-G3-A7M9	0.153425	1	4.58299	4.05551	4.87643	4.94199	2.90912	4.31278	3.60201	3.66417	3.81148	3.55508	3.39385	5.17335	3.43449	3.51397	3.67216	5.25413	3.9967	3.36537	3.06732	3.14045	high
TCGA-DD-AACJ	5.7589	0	0.861416	0.504443	1.81144	0.388452	0.468883	1.17932	0.46188	0.296438	0.326477	1.59051	0.508289	1.01072	0.403684	0.417143	0.393617	2.21113	1.29119	0.864519	0.597159	-0.239692	low
TCGA-DD-A4NK	3.31507	1	0.873648	0.752819	1.1119	1.0159	0.579671	1.02388	0.433642	0.689182	0.430567	0.329381	1.19187	1.01987	0.449719	0.379802	0.525495	1.47224	0.344862	0.800073	0.718565	0.269815	low
TCGA-DD-A3A5	8.56164	1	2.23775	0.940223	3.26871	1.7878	1.56616	2.71635	0.917941	1.17288	1.43333	1.68673	2.18753	2.34803	0.923256	1.06845	1.41471	3.84471	0.280124	2.89868	2.10761	-0.055345	low
TCGA-DD-AACF	1	1	2.49762	1.66972	3.914	1.79504	2.00235	3.70889	1.03875	1.5348	1.54397	1.22794	2.52017	2.77096	1.33671	1.06381	2.33656	4.23808	0.415415	3.10769	1.85673	-0.365268	low
TCGA-K7-A5RF	1.72877	0	0.556067	0.322992	1.49092	0.592813	0.515551	0.596211	0.166399	0.422129	0.311067	0.574877	0.535286	0.850547	0.336668	0.316765	0.511157	1.08062	0.977042	1.013	0.594996	-0.0113009	low
TCGA-ZP-A9D1	0.0575342	0	1.02553	0.992173	2.0136	0.898769	0.724476	1.89213	0.564479	0.837444	0.642168	2.26526	0.952887	1.43325	0.399892	0.516591	0.701912	1.72036	1.05144	1.15085	0.661292	-0.071687	low
TCGA-DD-AADB	3.40274	0	3.2988	2.52878	3.60515	2.70742	2.46567	3.44699	2.51878	2.36978	1.89789	1.40245	1.50024	4.44101	1.23434	2.32278	2.00588	3.92039	1.62999	1.57613	1.57268	0.46513	high
TCGA-DD-AAVZ	5.20548	0	1.66751	2.0687	3.25135	1.74038	1.65505	3.12915	1.07186	1.45595	1.56259	1.34624	1.55199	2.85189	0.527174	1.42534	1.61727	2.94245	1.33938	1.71324	0.8086	0.229624	low
TCGA-BC-A216	3.70137	0	3.5072	3.69616	4.94897	3.51168	2.90356	4.49329	3.01546	2.64233	2.66819	2.85714	3.4884	4.94191	3.17973	2.71309	2.29669	5.59411	3.16681	2.85828	2.695	1.09879	high
TCGA-DD-A1EF	1.07945	1	2.13138	1.9441	2.83442	2.60897	1.41804	2.22639	1.34309	1.50012	1.70608	1.13827	1.41109	2.9546	0.665762	1.08539	2.21204	2.70528	0.379537	1.52218	1.32448	0.844887	high
TCGA-DD-AADL	1.74247	0	2.42189	1.35059	2.8096	2.40698	1.68073	2.93876	1.3735	1.34307	1.06204	2.55921	2.1917	2.80273	1.54003	0.846212	2.25054	3.15189	1.41688	2.65782	1.33323	0.882133	high
TCGA-KR-A7K8	2.48219	0	2.02592	1.2579	3.09427	2.04403	1.50683	3.15078	2.2842	1.28195	1.39767	0.152978	2.08685	2.45306	1.08336	1.03165	0.982227	3.47593	0.545532	1.41498	1.76953	0.526408	high
TCGA-ED-A7PX	0.0164384	0	2.61027	2.09017	4.25117	2.52644	1.98396	2.17499	1.83248	2.07648	1.63493	2.43226	1.46655	3.61193	1.63093	1.15091	2.29001	3.38563	3.4018	2.13709	2.00161	0.683782	high
TCGA-DD-AADK	2.87397	0	1.48772	1.32106	1.95481	1.33867	1.22898	3.40054	1.21546	1.13923	0.850583	1.45117	1.75681	1.98591	0.456141	0.600019	1.21364	3.17483	3.319	1.33649	1.49568	0.362996	high
TCGA-BW-A5NO	0.0547945	0	2.07771	0.834301	3.23445	2.07538	1.10198	2.46683	0.998541	1.07188	1.0615	2.22285	1.82995	2.55179	1.09987	1.3813	1.83296	2.92634	0.200089	1.99785	1.1397	0.614737	high
TCGA-DD-A39W	2.26575	1	0.919399	0.791213	1.71305	1.25149	0.642374	1.34111	0.350603	0.628487	0.591121	0.333537	1.34571	1.52521	0.483368	0.638847	0.722822	2.10241	0.151899	1.08326	0.654124	0.148604	low
TCGA-GJ-A9DB	0.183562	1	2.16933	1.44991	3.64738	1.96319	1.51039	2.62223	1.43799	1.25805	1.38609	2.26676	2.40199	2.75925	1.23863	1.0707	1.85006	3.03553	1.50649	2.59767	1.74011	0.687096	high
TCGA-DD-A1EA	6.61644	0	1.53583	2.46256	2.09389	1.76286	1.36285	2.211	0.853564	1.47674	1.51205	1.77783	2.44031	3.40448	0.892404	1.08023	1.27043	2.88223	0.370993	1.06719	1.28639	0.0436972	low
TCGA-UB-A7MD	0.142466	1	2.07614	1.18772	3.57929	1.91238	1.13712	2.15256	0.806547	1.52602	1.38941	1.84526	2.11391	2.50326	0.782635	1.54601	1.18412	2.6116	1.18418	1.5317	1.83876	0.400903	high
TCGA-ES-A2HS	1.88493	1	1.37347	0.369257	1.84182	0.850926	0.850378	1.7357	0.6109	0.453346	0.614397	0.232052	0.442099	1.32012	0.408949	0.440821	0.663912	2.5311	3.51475	1.78884	1.03599	-0.166924	low
TCGA-G3-A3CJ	1.6274	0	0.93048	0.326746	3.00873	0.488506	0.420863	0.768544	0.251227	0.387084	0.345618	0.140516	0.535867	0.733704	0.32296	0.536526	0.362736	1.55723	1.80032	0.744981	0.474119	-0.124803	low
TCGA-FV-A3R2	0.531507	1	2.02873	1.50052	2.5525	2.60659	1.79357	2.97408	2.05118	1.64385	1.65391	2.79318	2.21064	2.94914	0.91538	0.905277	1.54589	3.36679	1.94873	1.07092	1.12369	2.11337	high
TCGA-2Y-A9GZ	2.32329	1	1.49558	1.11267	1.66137	1.79908	0.769301	1.74764	0.920824	0.786941	0.931731	0.17242	1.95551	2.03062	0.895204	0.655724	1.07149	2.21801	0.172011	1.62974	0.717168	0.58593	high
TCGA-4R-AA8I	0.717808	1	2.35479	2.05869	2.24569	2.47034	1.10584	2.50977	1.70585	1.74168	1.55711	1.50365	2.52799	3.40586	0.989807	1.02726	1.54896	3.08751	0.743209	1.86869	1.3671	0.745564	high
TCGA-DD-A4NG	2.19726	1	1.26591	1.11468	2.12413	0.953341	0.971748	2.23897	0.982895	1.1556	0.909885	1.1495	1.27936	2.18535	0.572229	0.669089	1.07444	2.24889	3.87758	1.41846	0.876819	0.311979	low
TCGA-RC-A6M5	0.0410959	0	0.535546	0.390005	1.66823	0.468845	0.698794	1.28128	0.200718	0.33365	0.266304	0.543354	0.524953	0.719672	0.266237	0.286438	0.281482	0.95904	3.19231	0.555253	0.462921	0.171995	low
TCGA-2Y-A9H0	10.0685	0	3.18231	2.75077	3.60409	3.07053	2.56176	4.39408	2.76475	2.48197	2.61152	2.22064	2.98589	4.79774	2.26502	1.55296	2.81918	4.65532	0.377809	3.68342	2.56142	0.231682	low
TCGA-DD-A11B	0.0383562	1	1.26117	1.44219	1.90237	1.19766	1.04303	1.96816	0.735652	0.915375	0.890159	0.279487	1.19056	2.21066	0.367024	0.870389	1.09651	2.09794	1.0405	1.08355	0.496876	0.00661761	low
TCGA-G3-A25V	2.35616	0	0.908426	0.427866	2.05294	1.01107	0.680003	1.44472	0.404373	0.477993	0.540517	0.262772	0.838051	1.43414	0.404308	0.421176	0.836723	1.80882	1.94516	1.05616	0.786991	0.051081	low
TCGA-DD-AADQ	1.19452	0	1.00203	0.493274	2.39488	0.861523	0.564871	1.59211	0.591538	0.583159	0.430584	1.17761	1.11403	1.36926	0.459056	0.50541	0.567446	3.18068	0.618818	1.00421	0.637979	-0.0263907	low
TCGA-CC-A8HS	0.821918	1	3.91231	3.31546	4.11526	2.73399	2.32795	3.20374	3.05331	2.42055	2.04604	1.99684	1.83309	5.11035	1.93352	2.55772	3.39327	4.29366	3.75406	1.9463	1.90186	1.08258	high
TCGA-DD-A1EL	1.13699	1	3.01924	2.24414	4.05464	2.88818	3.09016	3.80498	2.18249	2.36617	2.08447	2.08525	3.27001	4.11177	1.44157	2.57567	2.60731	4.42994	2.64065	1.97121	2.29627	2.13314	high
TCGA-WQ-AB4B	1.08219	0	1.353	0.633112	3.92283	1.2487	0.977346	2.03761	0.905789	0.804217	0.68627	0.967403	0.84067	1.72459	0.330508	0.745659	0.914562	3.43704	1.2824	1.6776	0.891551	-0.123589	low
TCGA-5R-AA1C	1.42466	0	1.29946	1.14806	1.97592	1.59395	1.07765	2.87676	0.797291	1.52625	1.27543	0.776073	1.66525	1.94365	0.713138	1.16236	1.05946	2.39111	0.222182	1.90926	0.909235	0.112655	low
TCGA-ED-A8O6	0.153425	1	2.18069	2.22426	3.13432	3.20642	1.63249	2.50583	1.82769	1.86145	1.6881	3.01544	1.71732	3.87663	1.09849	1.40573	2.25478	3.4906	3.78066	1.34963	1.30851	2.01639	high
TCGA-DD-AADD	3.3726	0	3.43804	2.91698	3.83856	3.61103	2.19868	3.57741	1.8963	2.34031	1.94542	1.39809	2.80784	4.58506	2.18287	2.25048	3.1659	3.84308	2.3025	2.08561	2.19407	0.999499	high
TCGA-BC-A10S	3.89863	1	0.678568	0.347739	2.31155	0.673958	0.415409	0.910786	0.419026	0.44228	0.327726	0.621611	0.426859	0.653556	0.329567	0.347751	0.617393	1.33085	0.954908	1.27985	0.800234	-0.140592	low
TCGA-DD-AAEB	1.30959	0	0.522239	0.382255	3.08942	0.514306	0.511242	1.22398	0.22813	0.328836	0.267018	0.277975	0.586413	0.959309	0.356138	0.44442	0.385491	1.99996	0.243205	0.939103	0.60135	-0.756415	low
TCGA-WX-AA44	1.68493	0	2.67534	2.50319	3.82923	3.05528	1.8814	2.3907	2.0422	1.41279	1.65125	2.00515	1.61937	3.79113	1.40874	1.42767	2.39393	3.97513	4.5025	3.38062	1.63071	1.38401	high
TCGA-PD-A5DF	1.75068	1	2.25155	1.67016	3.96385	2.31231	1.72904	2.90286	1.70468	1.73602	2.15695	1.53816	2.04957	3.40548	1.23454	1.42346	1.99447	3.45727	0.663339	2.92123	1.60838	0.484664	high
TCGA-YA-A8S7	1.12877	1	3.07173	2.80165	4.88439	3.62161	2.60015	4.11438	2.90069	2.1033	3.40134	0.984455	2.30867	3.60575	2.05813	2.56267	2.29006	4.52202	2.12644	3.05102	2.75877	1.6322	high
TCGA-5R-AA1D	1.23014	0	0.65799	0.6068	2.02796	0.636263	0.815968	1.29295	0.426437	0.475215	0.517467	0.760687	0.707839	1.32914	0.368131	0.441963	0.543305	1.34885	1.30901	0.728415	0.525482	-0.0950695	low
TCGA-DD-AACH	0.534247	1	3.49397	1.96704	3.12656	3.37607	2.73319	4.65225	2.55954	2.98197	2.86657	3.05329	3.7575	4.58908	2.20178	1.69187	3.15322	5.21119	2.34432	3.13003	2.85267	1.90443	high
TCGA-CC-A8HV	0.764384	1	2.27306	2.82256	3.37749	2.37872	1.87604	1.91964	2.1014	1.3613	0.898574	2.54202	1.68092	3.79428	1.01483	2.1414	1.91259	4.0981	4.5111	1.98931	1.26191	1.69921	high
TCGA-G3-AAV0	1.30411	0	0.83793	0.557626	2.33221	0.733181	0.497998	1.3933	0.630191	0.37699	0.274748	0.293925	0.385662	0.68019	0.352907	0.364162	0.620142	2.28952	0.363807	1.67045	0.647035	-0.427634	low
TCGA-DD-AAED	2.09041	0	0.943284	1.52015	3.05389	1.46868	0.910615	2.29133	0.826606	0.715245	0.341084	2.08909	0.909905	2.12281	0.550466	0.896057	0.835313	3.0106	5.0877	1.36435	0.404494	0.603296	high
TCGA-ZS-A9CG	0.934247	0	0.911811	0.341838	1.46144	0.451041	0.492171	0.732995	0.236262	0.291353	0.261783	0.710876	0.49965	0.606936	0.391808	0.338234	0.487332	1.01298	1.58667	0.83519	0.749174	-0.0282871	low
TCGA-K7-A6G5	1.40274	0	1.10441	0.675386	2.12457	1.25064	0.82356	2.1538	0.542797	0.784611	0.7112	0.2724	0.797686	1.61605	0.551353	0.464807	0.82636	2.81	2.92662	1.73829	1.09894	-0.251615	low
TCGA-DD-AADS	1.29863	0	1.00656	0.263418	2.46963	0.508828	0.527576	1.01743	0.26511	0.262949	0.193895	0.85229	0.352424	0.545838	0.338454	0.242385	0.589977	2.37165	0.120247	1.4072	0.600542	-0.498569	low
TCGA-DD-AAEK	2.92329	0	1.53619	1.58551	1.8536	1.50719	1.29184	1.97838	0.880392	1.4799	1.42389	0.478973	1.78878	3.0016	0.72767	1.10123	1.1728	2.66339	0.621475	1.18824	1.05538	0.0321492	low
TCGA-DD-A4ND	7.52329	0	1.33214	1.72253	2.84112	2.14502	1.48358	3.81211	1.22642	1.36938	2.00468	2.85527	1.69132	3.86938	0.847984	1.51005	2.17763	3.21444	1.07143	1.25769	0.99442	0.484038	high
TCGA-2Y-A9H7	3.2	0	1.90264	1.76099	2.3958	1.67467	1.64754	3.02541	1.42074	1.27662	1.49769	1.1351	1.36014	2.92279	0.551081	0.889682	1.12462	3.37678	0.616359	1.42341	0.788932	-0.0778284	low
TCGA-RC-A7S9	1.75342	0	1.88417	2.87638	3.95345	2.40217	1.98553	3.43124	2.19818	1.7688	2.3088	0.265759	2.09251	3.8191	0.982903	1.81868	2.07418	4.40681	3.20669	2.80212	1.35433	1.01714	high
TCGA-DD-AADI	2.9726	0	1.425	0.848407	3.70671	0.931878	1.25558	3.32147	0.874345	0.579796	0.696302	1.21092	0.749635	1.54397	0.413956	0.671729	1.07291	3.59797	4.88802	1.95854	0.656922	0.0221566	low
TCGA-DD-A4NA	2.76164	0	1.94475	1.81855	2.29539	1.96408	1.24785	4.26412	1.59886	1.55821	1.63786	3.66197	1.88546	3.36389	1.12544	0.903061	1.34189	2.49207	1.28394	1.39381	1.72418	-0.45595	low
TCGA-BC-A10T	2.29315	1	1.71052	1.3559	2.56149	1.92779	1.33373	2.77559	1.04702	1.24436	1.42374	1.58958	2.22898	2.75729	0.979491	1.29411	1.2855	3.3502	0.655305	2.23623	1.17235	0.475136	high
TCGA-RC-A7SH	1.28219	0	3.15777	2.13477	4.46272	2.35069	1.58505	2.43267	1.7795	1.25546	1.06323	0.595541	1.93262	3.13517	0.683262	1.72029	2.21146	4.71179	4.58767	3.1744	2.35085	0.714896	high
TCGA-WJ-A86L	0.945205	0	3.03208	1.59133	2.88352	2.37352	1.06776	2.05038	1.5545	1.17274	0.968464	3.01355	1.74485	3.05019	1.46573	1.25594	2.15137	2.90835	1.04345	2.28931	1.77585	0.448384	high
TCGA-DD-AA3A	1.12329	1	3.33411	3.76658	3.40356	3.22138	2.70671	2.07685	2.67563	3.0508	1.72046	3.54304	2.94223	4.32428	2.40571	1.66897	2.46622	5.10968	3.87657	3.48638	2.92223	1.59511	high
TCGA-CC-A7IE	0.594521	1	2.34538	2.15163	3.9372	2.09672	2.36426	3.67572	1.9175	1.9795	2.31592	1.95013	2.11712	3.87061	1.04254	2.26074	1.797	4.28312	3.42724	1.40622	1.43948	1.26343	high
TCGA-DD-AAVS	4.99452	0	2.33712	2.2197	3.33824	1.89881	2.28014	3.80558	1.34206	1.63568	1.71544	1.66413	1.33052	3.31587	0.707591	1.01817	1.74442	3.3986	2.96689	2.08305	1.05792	-0.120556	low
TCGA-DD-AAE7	1.76438	0	0.698476	0.539199	1.61761	0.869662	0.743121	1.01315	0.444468	0.520982	0.456662	0.281408	0.823065	1.02635	0.294714	0.488073	0.431694	1.38621	1.4625	0.834045	0.741662	0.307242	low
TCGA-BC-A3KG	1.86301	0	3.09506	4.23928	5.44281	4.04629	2.75252	4.98246	2.53356	3.48405	3.7071	1.02406	3.11921	5.68965	2.92369	3.39907	3.47335	5.31779	0.181904	3.05888	2.42249	0.414749	high
TCGA-DD-A3A2	5.83836	1	0.413004	0.246584	1.50048	0.486258	0.257802	0.809991	0.198298	0.3506	0.207795	1.15716	0.426927	0.642078	0.302669	0.295918	0.391192	0.99861	0.130667	1.70484	0.750991	-0.487926	low
TCGA-DD-AAVR	6.88493	0	0.98273	0.905092	2.30855	1.28932	0.846184	2.42331	0.834557	0.690993	1.06875	0.325079	1.34261	2.49418	0.377226	0.588968	0.662624	2.70305	3.30619	0.749421	0.769148	0.150627	low
TCGA-CC-A7II	1.09315	0	4.94182	3.18005	4.90297	4.044	2.3006	5.33679	2.9234	2.61739	3.44677	2.04282	2.44188	4.41689	3.33512	3.03843	3.50149	5.69056	4.29368	3.44462	2.75703	1.1629	high
TCGA-DD-AACN	3.56712	0	1.13652	1.20734	2.63197	1.0433	0.683983	1.50104	0.473941	0.750738	0.725771	1.1428	0.662096	2.06158	0.451447	0.836752	0.954769	2.25375	4.27983	0.924555	0.656924	0.172121	low
TCGA-2Y-A9GX	6.69041	0	1.442	1.16937	2.47001	1.36343	1.01037	1.23247	0.665589	1.08502	0.859263	1.49285	1.43086	2.28354	0.81622	1.00594	1.09992	2.20356	0.946725	1.47364	1.13368	0.158083	low
TCGA-CC-A3MA	0.830137	1	3.35817	3.77723	3.59343	4.19771	3.00979	3.3268	2.98052	2.2559	2.58573	4.5758	2.53376	4.68621	2.29473	1.97003	2.80947	4.9242	2.88435	2.68234	3.26877	2.05842	high
TCGA-DD-AACQ	1.18356	1	2.23291	1.29569	2.68878	2.59198	1.01039	2.03701	1.0605	0.941913	0.884261	2.24055	0.996851	2.27039	0.843998	0.851765	2.11961	2.69583	4.13841	2.13257	0.760529	1.60714	high
TCGA-RC-A7SF	1.5863	0	1.43641	1.252	3.18064	1.75864	0.842037	2.72227	1.01825	0.880326	0.992473	1.38904	1.56961	2.23986	0.734697	0.969862	1.02293	3.55088	2.68681	1.25442	1.51148	0.193456	low
TCGA-DD-AADW	1.60822	0	2.97585	3.11474	4.10689	3.01819	2.58215	4.11792	2.29584	2.2733	2.58636	1.51832	1.53086	4.86718	1.91311	2.05982	2.88467	3.22606	4.51162	2.78306	1.70693	0.455806	high
TCGA-G3-A3CH	2.13699	0	1.85958	1.55296	2.32501	1.93959	1.17676	1.97226	1.11388	1.13683	0.894091	1.8021	2.19034	2.79974	0.989341	1.14352	1.4607	2.62388	1.53403	2.09566	1.22626	0.722824	high
TCGA-DD-A1EI	0.50137	0	2.35621	1.56059	3.43503	2.1912	1.46579	2.7831	1.29531	1.40889	1.03877	2.88108	2.01285	3.29171	0.873965	1.43974	1.82687	3.37391	4.21528	1.5946	1.13658	1.26609	high
TCGA-ZP-A9CZ	1.93425	0	2.80531	2.40375	3.45645	2.81667	2.10619	3.7636	2.44166	2.18399	2.22743	1.85662	2.77077	4.42016	2.13577	1.8207	2.3954	4.21453	1.33258	2.74181	1.49683	0.910495	high
TCGA-KR-A7K0	0.178082	1	1.00454	1.26077	2.39761	1.44977	1.0797	1.83337	0.716154	0.892874	0.9619	0.570493	1.43712	2.12424	0.501244	0.905489	0.828245	2.60343	1.96478	0.982894	0.93137	0.436361	high
TCGA-BC-A10Y	1.94795	1	3.5071	1.9624	4.08844	3.58385	2.43514	3.66382	1.32936	1.92596	1.91297	1.74641	3.07453	3.35634	2.47	2.18512	2.8494	4.08606	0.185546	3.87751	3.00004	0.54684	high
TCGA-ED-A8O5	1.11233	0	2.04701	1.99656	2.03802	1.6663	1.41425	3.82643	1.60414	1.19687	1.5244	0.194411	1.51586	3.34723	0.618336	1.01289	1.8453	3.16882	0.707774	1.27138	0.989783	-0.486523	low
TCGA-CC-A9FS	0.578082	0	1.63843	1.18939	2.3022	1.37231	1.113	3.42239	0.916535	1.07207	1.06746	1.62506	0.986921	2.22559	0.642356	0.743529	0.888186	2.63827	0.390824	1.20349	0.895406	-0.892624	low
TCGA-UB-A7MB	1.64658	0	3.82411	2.11675	4.01738	3.4766	2.35729	3.81313	2.63605	2.70119	2.53085	2.24109	2.50683	4.9618	2.14695	2.42037	2.90944	3.92954	0.105145	3.19022	2.74296	0.459192	high
TCGA-ED-A627	1.1589	0	0.839852	0.617168	1.96871	0.920435	0.756995	1.08047	0.535453	0.665297	0.661948	1.76587	0.851494	1.44254	0.519465	0.485257	0.765328	1.92657	1.46889	1.43368	0.862028	0.285486	low
TCGA-XR-A8TE	2.53425	0	0.598054	0.55801	1.84939	0.620936	0.561636	1.39305	0.238934	0.382746	0.439182	0.353059	0.57164	1.3585	0.48154	0.517393	0.41909	1.44995	3.75663	1.07486	0.81247	-0.261699	low
TCGA-G3-A7M7	0.989041	0	0.697517	0.386771	1.89854	0.798987	0.611664	1.38143	0.2819	0.376191	0.345668	0.514001	0.479971	0.875336	0.290639	0.300494	0.575255	1.43738	1.39499	0.84452	0.564971	-0.10401	low
TCGA-G3-AAUZ	1.31507	0	2.78876	0.739179	3.31218	1.63696	1.67397	2.55055	1.12516	0.956177	0.921365	1.18343	1.1805	2.54595	0.948888	0.817317	1.40702	4.21765	0.827815	2.07793	2.03635	-0.800241	low
TCGA-RC-A7SK	1.29315	0	1.60027	0.918506	2.71864	1.40908	1.24174	2.25367	0.880644	0.955523	0.960426	1.50043	1.94494	1.80637	0.480973	1.49773	1.30911	2.57522	2.21338	1.83501	1.22127	1.17617	high
TCGA-DD-AACI	4.43288	0	1.10296	0.693252	2.31556	0.979276	0.780813	2.41274	0.813601	0.883183	0.673321	1.13393	0.599966	1.2303	0.361375	0.383368	0.583594	3.26995	3.45182	1.24702	0.618792	0.172142	low
TCGA-DD-A4NH	2.51233	0	2.52467	2.55236	3.19871	2.20461	1.61294	2.91085	2.0908	1.85811	1.70638	3.43517	1.48105	3.4325	1.06024	1.29468	2.52476	3.99976	3.75559	2.28927	1.03266	1.42712	high
TCGA-WX-AA46	2.07123	0	0.371598	0.337396	1.36625	0.512463	0.314671	0.547071	0.217699	0.287204	0.240171	0.296679	0.433578	0.689168	0.29764	0.283372	0.42949	0.973067	0.581377	0.923715	0.558505	-0.137856	low
TCGA-DD-A4NQ	1.02192	1	2.65441	2.3668	3.38393	2.84399	1.99035	4.16181	1.67669	2.38881	1.98314	2.13523	3.14354	3.92562	0.991608	1.95986	2.24048	4.1633	1.73555	1.92986	1.77052	1.18851	high
TCGA-G3-A5SM	1.42466	0	1.67042	1.51659	2.63968	1.58101	1.29126	2.8297	1.02591	1.31064	1.25634	1.5437	2.19584	2.65478	0.62082	1.12854	1.36055	3.06089	0.67294	1.62691	1.6143	0.0685073	low
TCGA-MI-A75E	1.38904	0	1.27865	0.906984	1.94202	1.60003	0.842978	2.077	0.744776	0.904793	1.02986	0.766257	1.39215	1.8997	0.538933	0.436328	0.5506	2.55515	1.56891	1.37027	0.911289	0.18571	low
TCGA-DD-A11D	4.27397	1	0.774837	0.832529	1.94805	1.104	0.569346	1.14531	0.503509	0.594922	0.591918	1.64779	1.25605	1.54558	0.378493	0.541934	0.410912	1.95801	1.69108	1.20845	0.734963	0.444351	high
TCGA-CC-5262	0.282192	1	2.65238	1.73785	3.40187	2.75188	1.85784	3.92266	2.22609	1.62488	1.86238	1.828	1.96854	3.04671	1.08992	1.47507	1.38196	3.81754	3.86449	1.66675	1.29602	1.57431	high
TCGA-2Y-A9GY	2.07397	1	3.03344	1.76749	4.57609	3.21172	2.44579	2.57665	1.81749	2.35091	2.04269	2.73847	1.90961	4.1083	2.07858	2.28736	2.79909	4.10922	4.15352	2.62013	2.65244	1.53032	high
TCGA-ES-A2HT	1.2	1	0.713763	0.325	1.56557	0.65413	0.44326	0.941503	0.303977	0.281284	0.278769	0.899142	0.346127	0.574898	0.266763	0.287369	0.229959	1.44886	1.80058	0.852889	0.51962	0.117542	low
TCGA-DD-AAW0	5.52055	0	1.25827	1.23387	1.88108	1.09815	0.700115	2.29575	0.946876	1.03955	0.827519	1.99607	1.51042	1.91848	0.47247	0.824097	0.847199	2.22748	1.15045	1.17654	1.06992	0.0733846	low
TCGA-G3-A3CI	0.493151	0	0.591229	0.576026	1.42505	0.636511	0.288418	0.581444	0.39078	0.445704	0.535423	0.350492	0.600919	0.8919	0.359584	0.34564	0.391886	1.35693	0.122001	0.606409	0.60904	-0.0735943	low
TCGA-DD-AAVV	6.72603	0	1.65542	1.44297	3.38971	1.63271	1.15117	2.62628	0.672252	0.880827	0.71495	1.90898	1.51963	2.48572	0.784495	0.988004	1.44266	3.08271	2.88631	1.34225	1.60636	-0.176712	low
TCGA-DD-A39Y	0.468493	1	3.04851	1.97182	4.56791	3.56604	1.90343	3.47353	2.61964	2.06682	2.0657	2.87744	3.00826	3.15401	1.85885	2.03729	1.75586	5.63834	2.25942	2.81507	2.33368	2.28119	high
TCGA-DD-A1EB	5.52603	0	0.835243	0.666861	1.70151	1.12412	0.299641	1.2765	0.490221	0.574982	0.425268	1.90112	0.865014	1.42523	0.42866	0.617811	0.50866	1.48159	0.125517	2.23935	0.808228	-0.315288	low
TCGA-DD-AAD1	1.54521	0	1.53557	1.37272	2.2997	1.52213	0.963984	1.84614	0.654657	0.962757	0.93111	1.75459	1.41112	2.34792	0.651636	0.742375	1.25499	2.15047	1.49571	1.26955	1.23425	0.0363454	low
TCGA-G3-A3CK	1.60274	0	1.07101	1.02139	1.67095	1.04251	0.86275	1.44532	0.360441	0.809011	0.769895	0.278309	1.29243	2.27175	0.491813	0.729385	0.873501	2.11672	0.635932	1.14577	0.58631	-0.284477	low
TCGA-DD-AACA	6.30411	0	2.38129	1.50306	2.94486	1.90576	1.46494	3.13246	1.05889	1.41683	1.22837	0.352449	1.99868	3.27369	0.967637	1.17165	1.44224	3.55394	0.720765	2.35408	1.74603	-0.907562	low
TCGA-5C-A9VH	0.882192	0	1.77353	1.79893	3.19283	1.85106	1.03253	2.6621	1.14503	1.30242	1.2426	0.407832	1.43335	2.42171	0.511158	1.02251	1.4275	2.95408	4.0848	2.3489	1.31552	0.317173	low
TCGA-FV-A23B	5.07397	1	2.61544	2.54715	2.07303	2.04682	1.69998	3.31038	1.65002	1.77944	2.08341	0.98541	2.07337	4.05898	0.898241	1.20306	2.13954	3.26238	0.435587	1.46763	1.03867	0.0335327	low
TCGA-DD-AADR	5.55616	0	2.29884	1.55753	3.13155	1.30921	2.07082	3.61074	1.9269	1.38424	1.29416	2.63088	2.3395	3.12895	1.13119	1.68212	1.76689	4.07804	0.218632	2.28079	1.19904	0.419242	high
TCGA-DD-A3A1	0.638356	1	1.61903	0.692373	1.68796	1.51015	1.26528	1.71424	0.70394	0.713353	0.666518	1.87783	1.28554	1.5233	0.562885	0.747098	0.866888	3.43683	1.03996	1.8713	1.17184	0.659464	high
TCGA-DD-A4NR	0.0246575	1	2.8485	2.0925	3.48112	2.87914	2.1084	2.93108	1.80187	1.95577	1.89934	2.27265	2.52443	3.42084	1.31195	1.58889	2.68531	3.8787	2.43464	2.91067	2.32017	1.52601	high
TCGA-DD-AAC9	0.950685	0	0.760623	0.600615	1.93558	0.929843	0.633487	1.33559	0.386817	0.486422	0.508024	0.478545	0.737633	1.12742	0.339808	0.450304	0.396558	2.00679	1.59274	0.925557	0.682089	0.00977316	low
TCGA-CC-5259	0.684932	0	1.40499	1.11194	3.63305	1.04993	1.30725	2.92939	1.32983	0.869437	0.910602	0.781178	0.665897	2.41991	0.252291	1.24029	0.950814	4.3711	2.72931	1.79368	0.886629	-0.326132	low
TCGA-EP-A2KA	1.71781	1	2.06258	2.39994	3.19376	2.58998	1.44712	3.1514	1.61411	1.6603	1.53489	1.91438	2.24184	3.15888	0.940815	1.14777	1.33918	4.39016	3.43703	2.72986	1.93849	0.611772	high
TCGA-DD-A1EC	1.64932	0	1.73568	1.53199	2.00673	2.03104	1.32202	2.16446	1.13521	1.54633	1.49222	0.309024	1.38312	2.76708	1.03173	0.716236	1.43476	2.82393	0.189152	1.60823	1.21607	-0.0565988	low
TCGA-DD-AAD3	3.54795	0	1.17162	1.0776	2.37544	1.48847	0.819182	1.87661	0.51592	0.959672	0.848907	0.987925	1.03831	2.0157	0.60104	0.606263	0.959942	1.91056	2.83164	0.859649	0.927998	0.142257	low
TCGA-DD-AACS	4.94247	0	2.6394	2.33855	3.06167	2.24924	1.53532	2.76919	0.910931	1.59146	0.938323	2.02375	2.63817	4.46405	1.37093	1.34367	3.06689	2.97492	3.26242	2.90133	2.31356	-0.323809	low
TCGA-BD-A3ER	3.05479	0	1.04991	0.790777	1.68127	1.16295	0.77133	1.47924	0.688073	0.552897	0.680106	1.11149	0.825092	1.43232	0.449128	0.554041	0.641647	1.67446	2.02411	1.20757	0.721389	0.393975	high
TCGA-GJ-A6C0	0.0849315	1	2.31547	2.18051	3.64473	2.60061	1.71822	3.35913	2.17943	2.04041	2.02531	2.85751	2.44795	4.20747	1.76739	1.3805	2.54002	3.99158	0.659912	2.32112	1.25374	0.894727	high
TCGA-2Y-A9GS	1.98356	1	3.13186	2.20523	3.65072	3.41031	2.35718	3.35168	1.95869	2.63693	2.28278	2.50333	3.3762	4.25741	1.84868	2.52786	2.57218	4.0403	4.13464	3.07315	2.50649	2.25588	high
TCGA-BC-A8YO	1.53973	0	3.69636	3.55994	3.92703	3.90551	2.33905	4.24127	2.67248	3.25921	3.30113	2.56585	3.50643	5.67349	2.29893	2.81249	2.93783	4.47252	2.69005	2.68688	2.2215	1.63351	high
TCGA-CC-A9FW	0.679452	0	2.10972	1.52298	3.29368	1.72794	1.64207	3.11272	1.15275	1.40304	1.26429	2.67873	1.65617	2.91586	0.768198	1.20694	2.44823	3.25401	0.491783	1.68581	1.20907	0.350757	low
TCGA-DD-A1ED	6.30411	0	0.319254	0.263105	0.69162	0.382579	0.197883	0.564443	0.164798	0.27888	0.204148	0.369217	0.341676	0.61959	0.274872	0.262417	0.309911	0.769473	0.364329	0.441956	0.367751	-0.126248	low
TCGA-EP-A12J	1.56164	0	1.29608	1.34618	1.42074	1.63284	1.06592	1.76245	0.75624	1.12661	0.916064	0.369369	1.62979	2.39705	0.454198	0.489151	0.769027	2.03981	3.00047	1.65883	0.914597	0.44975	high
TCGA-DD-A1EJ	2.75342	1	2.79563	1.86073	3.94896	2.15843	1.68275	2.62554	1.62425	1.64178	1.66237	3.07215	1.82089	3.8061	1.57118	1.71785	2.60011	3.46268	4.57375	2.25024	2.0457	0.892436	high
TCGA-G3-AAV2	1.01918	0	0.63472	0.642002	1.9578	0.802213	0.511032	1.35091	0.243551	0.321975	0.308716	0.332764	0.616368	0.778998	0.326841	0.298326	0.629133	1.15992	1.20048	1.16223	0.915165	-0.383584	low
TCGA-DD-AADY	1.52055	0	1.73578	2.42603	2.29556	1.56492	1.16749	3.20173	0.896925	1.47276	1.41988	2.08852	1.54182	3.21617	0.624267	0.757289	1.42859	2.89531	4.74859	1.86025	0.888229	-0.109999	low
TCGA-CC-5263	0.353425	1	3.86707	3.65871	5.25402	3.95704	2.83779	4.59667	3.40174	0.717606	3.43435	2.86022	3.65031	6.25928	2.98054	3.24122	3.20428	4.95396	4.2755	2.91521	2.66975	2.04564	high
TCGA-DD-AADP	1.25479	0	1.49702	1.72038	2.41665	1.24519	1.21972	3.89004	0.869188	1.37394	1.2097	1.26189	1.22588	2.95394	0.468537	1.14806	1.29836	3.22266	1.97747	1.21857	0.921367	-0.924525	low
TCGA-BC-A69I	1.06027	0	0.732564	0.40588	1.41214	0.582401	0.59356	1.16875	0.398479	0.450131	0.369573	0.152116	0.731109	0.817256	0.382674	0.290447	0.443062	2.02039	0.166194	1.78643	0.532345	-0.324825	low
TCGA-DD-A4NO	6.15068	0	1.04433	0.887412	2.25454	0.820623	0.795603	1.50442	0.398029	0.648503	0.493311	1.69908	0.871669	1.61541	0.361545	0.597677	0.542815	2.01587	1.42903	1.05324	0.610686	-0.223426	low
TCGA-BC-A10W	0.249315	1	2.89675	2.02078	3.78673	3.37246	2.27489	4.70758	2.00333	3.0048	3.14975	4.0425	3.51717	5.48257	2.11551	2.88963	3.18678	4.65043	2.84408	2.31595	1.80607	2.14962	high
TCGA-LG-A9QC	1.16438	0	1.69796	1.0082	2.26411	1.11799	0.984323	1.95195	0.809429	0.698721	0.650363	0.188806	1.63915	1.88166	0.503029	0.658497	0.994881	2.75936	1.83159	1.01202	1.1076	0.10961	low
TCGA-DD-A11C	1.8137	0	2.38777	2.10965	2.66322	2.96449	1.83229	2.21103	1.35907	1.57529	1.36425	1.52177	2.6796	3.97317	1.30571	1.29045	1.81275	3.53616	0.185096	2.67002	1.4864	0.688494	high
TCGA-DD-AACV	4.19452	0	2.83065	2.341	4.68493	3.42206	3.03425	3.90238	2.23286	2.66302	1.84181	0.94755	3.59749	4.99278	2.84709	2.71916	3.47427	4.64862	0.121883	3.8549	3.41132	0.384968	high
TCGA-CC-5264	0.279452	1	3.22316	3.76269	4.96105	4.15622	2.36651	4.32339	3.80837	2.84901	2.7661	3.29664	3.45244	5.59529	2.45614	2.58842	4.09926	4.53544	2.11645	3.23791	2.42576	2.4582	high
TCGA-DD-AACL	0.293151	1	3.1717	2.73631	4.89798	3.53411	2.87817	4.82515	2.88233	2.4359	2.84318	2.44962	2.95871	4.03843	1.63908	2.40684	2.56777	5.58786	2.93791	2.15035	1.78832	2.52893	high
TCGA-DD-A116	4.44384	1	1.81539	0.547953	3.01156	1.07234	1.39129	2.81359	0.882989	0.838826	0.79917	0.661266	1.36037	1.61619	0.522117	0.977171	1.0357	3.25236	3.05207	1.21014	1.28661	0.274315	low
TCGA-CC-A7IG	0.819178	1	3.44185	2.71367	5.2019	2.96639	2.67382	3.55509	3.49887	1.34307	1.71105	1.9874	1.81393	4.00439	1.6299	2.10466	2.45809	5.95665	5.25694	3.15515	2.70189	1.57174	high
TCGA-DD-AAE9	1.97808	0	1.48481	1.29356	2.45425	1.75897	1.38516	2.85497	1.02725	0.86654	0.937599	0.444841	1.26572	1.94973	0.735623	0.621003	1.62266	2.74472	0.175377	1.60584	1.6087	-0.291802	low
TCGA-DD-AAVP	7.53973	0	1.29353	0.80681	2.50474	1.1422	0.892701	1.61236	0.485594	0.683208	0.497924	0.591696	0.901577	1.55013	0.510601	0.487654	0.813564	2.59039	0.56607	1.20672	1.07113	-0.515156	low
TCGA-G3-AAV5	0.969863	0	2.02672	1.45364	2.97419	1.93583	1.26922	2.49032	0.895793	1.19477	1.16178	0.419088	2.2587	2.44957	0.809432	0.912542	1.0129	3.71936	5.62215	1.9315	1.81656	0.792925	high
TCGA-ZS-A9CF	6.60822	0	3.80031	2.46865	2.7475	3.29968	1.82478	2.90206	2.16468	2.16073	1.84267	1.30441	2.95025	4.69984	1.68251	1.46279	2.10823	3.96261	0.310408	3.05301	2.16224	0.202245	low
TCGA-NI-A8LF	2.18904	0	1.19795	0.57122	2.1359	0.903795	0.788066	1.7141	0.513192	0.688656	0.437791	1.06554	1.27775	1.82458	0.51451	0.529195	0.867415	2.58141	0.33491	0.57637	0.956362	-0.310704	low
TCGA-DD-A39Z	1.64658	1	2.09794	1.18785	2.23853	1.8007	1.60361	2.59682	1.36856	0.949053	1.17264	0.680523	1.10564	2.00148	0.66105	0.589849	0.787814	3.65882	1.64312	1.35022	1.20188	0.281127	low
TCGA-EP-A3RK	0.994521	0	2.74868	2.17219	3.29475	2.07913	2.13986	3.26238	1.96826	1.94768	1.52811	1.9248	2.23881	2.84134	1.46115	1.32147	1.81835	4.1326	0.928836	3.1805	2.28667	0.104559	low
TCGA-FV-A496	0.0273973	0	1.30066	0.946289	2.48542	1.85627	0.652517	2.62248	0.770912	0.822643	0.706613	1.46562	1.026	2.13203	0.448426	0.824069	0.751772	2.05383	1.72898	1.02461	0.848562	-0.0657455	low
TCGA-CC-A3MB	0.863014	1	3.20318	2.61634	4.46389	2.70618	2.86187	3.65772	2.45942	2.29462	2.17731	1.93444	2.73413	4.48676	1.67004	3.11914	2.86505	4.72712	3.60476	2.66174	3.18166	1.32127	high
TCGA-CC-A7IF	1.77808	1	2.16086	2.05904	2.53929	2.25153	1.38422	3.16022	1.79562	1.37185	1.36162	1.29111	2.12012	3.51916	1.04548	1.50088	1.72225	3.37124	0.791685	2.47682	1.64124	0.0856818	low
TCGA-ZS-A9CD	3.79726	1	1.15316	0.435194	2.32283	1.01161	0.524511	1.40791	0.41113	0.45403	0.374087	1.06167	0.672669	1.19871	0.425866	0.422186	0.680886	1.51611	2.45919	1.00063	0.959786	-0.0431406	low
TCGA-G3-A25S	1.13973	1	2.32247	1.36471	3.51871	1.83027	1.88209	2.98877	1.80112	1.35682	0.970913	0.517726	1.55504	2.31122	1.17006	0.910089	1.71904	5.00506	3.57739	2.36704	2.48101	0.220656	low
TCGA-BC-A217	3.8274	1	3.06259	2.02338	4.60279	3.29632	2.51779	3.92636	2.06575	2.23092	2.18073	1.85328	2.46288	4.12963	2.22288	2.16151	2.79141	4.97788	1.98003	3.89991	3.10021	0.398575	high
TCGA-DD-AAW2	5.08219	0	1.40362	1.00981	1.55883	1.2315	1.11017	2.11568	0.516029	0.92577	0.703808	0.313444	1.2619	1.97047	0.585081	0.56909	0.930361	2.2124	1.06668	1.62965	1.31604	-0.610724	low
TCGA-DD-A3A3	1.46575	1	1.63635	0.693916	2.39542	1.2368	1.24537	2.33207	1.05627	0.75011	1.07093	1.07217	1.54763	2.03757	0.539046	0.967449	0.725209	3.66734	2.7006	1.43255	1.36062	0.525048	high
TCGA-2Y-A9H8	1.73425	1	2.66611	2.14318	3.12899	3.12607	1.80551	3.85057	1.47114	1.38346	1.84835	1.85532	2.31975	3.24534	1.05111	1.83244	2.36524	3.28763	1.19196	2.19492	1.26706	1.32854	high
TCGA-G3-A7M6	1.73151	0	2.42856	2.55323	3.40242	2.56947	1.68501	2.60216	1.65707	1.64294	1.96981	3.96968	0.971631	4.13517	1.71336	1.67607	2.29038	2.59874	1.18565	1.80555	2.33551	-0.339295	low
TCGA-FV-A2QQ	1.99726	0	1.11759	0.982703	2.43924	1.14228	1.04386	2.24746	0.845444	0.906638	0.944758	1.00537	1.32998	1.42797	0.300307	0.831308	0.983143	2.83829	3.0415	1.18464	0.984139	0.871252	high
TCGA-ZP-A9D4	1.08219	0	1.48631	1.21915	1.86671	1.63722	1.00501	1.63618	0.451334	0.974959	0.87229	0.173564	1.42842	2.79482	0.495006	0.814668	1.01329	2.72492	0.388466	1.85104	1.01237	-0.525783	low
TCGA-LG-A9QD	1.00274	0	0.432992	0.30946	1.42243	0.453083	0.289419	0.608196	0.273825	0.307125	0.259653	0.811577	0.698605	0.572761	0.322091	0.307988	0.26357	1.15607	0.573613	0.8862	0.495626	0.107023	low
TCGA-RC-A6M4	0.060274	0	1.75739	1.54363	2.11145	1.95226	1.83046	2.72267	1.03183	1.37041	1.16795	0.902826	1.9745	2.56271	0.944122	0.69899	1.42859	2.87405	1.59865	2.21011	1.6535	0.201641	low
TCGA-ED-A7XP	1.09589	0	1.58331	2.00196	2.71792	1.75616	1.16197	3.16085	0.937473	1.18301	1.31718	1.61715	2.59329	2.8511	0.836313	1.27437	1.31591	3.54372	2.65794	1.71394	1.14641	0.558687	high
TCGA-2Y-A9HA	0.0986301	1	2.11199	0.949315	3.04599	2.19908	1.45934	2.98441	1.43644	1.64586	1.5367	2.45041	2.14369	2.79906	1.1871	2.0381	2.00827	3.07696	1.73838	1.20073	1.34799	1.715	high
TCGA-DD-AAE2	1.74795	0	1.90682	1.28779	2.72532	1.9944	0.930646	2.32738	1.04494	0.816629	1.08968	1.75901	1.90311	2.85838	0.876454	0.976918	1.3084	2.65138	0.288776	1.94627	1.47923	-0.0919112	low
TCGA-DD-AADF	0.315068	1	2.6619	1.55212	3.31005	2.01277	1.78558	2.82908	2.15286	1.27023	0.790992	0.966367	1.94798	2.21712	1.11162	1.15128	1.92147	4.75735	0.211936	4.4703	1.78112	0.324117	low
TCGA-DD-AACW	3.90137	0	2.91254	2.53353	4.08804	2.20811	2.2265	3.5459	1.55494	1.89379	1.91609	0.368059	1.86714	3.68971	0.790971	2.14788	1.96482	4.13813	0.677436	2.04239	1.05934	0.0223494	low
TCGA-MI-A75I	1.72603	0	2.44353	1.54046	2.91715	2.50129	1.73271	2.93174	2.2449	1.93664	1.73539	1.73096	1.75701	3.35601	1.17134	0.865802	1.89127	3.97773	1.64002	1.78138	1.35749	1.10491	high
TCGA-FV-A3I0	2.32329	0	1.60192	0.924358	2.44627	1.09521	1.53534	2.06678	0.791377	0.95124	0.925376	3.19902	0.713753	1.56545	0.903064	0.461346	0.831461	2.64655	4.95824	1.30305	1.28443	0.627852	high
TCGA-2Y-A9H1	3.36712	1	0.675912	0.219339	1.85216	0.503129	0.408783	0.941255	0.258917	0.242271	0.304073	0.558955	0.385696	0.484566	0.246313	0.263455	0.176389	2.06177	2.72953	1.12883	0.438363	0.206333	low
TCGA-CC-A8HU	0.942466	1	3.17149	2.56431	4.68383	3.52711	2.75949	3.823	2.65773	2.17312	1.59165	2.5804	2.30257	4.67559	2.89256	2.64559	3.33868	4.41499	1.22613	3.16761	3.35295	0.341955	low
TCGA-DD-AAD2	1.80274	0	1.67974	1.52241	2.511	2.03551	1.42378	2.42005	1.07929	1.38404	1.51888	0.872425	2.48676	2.69411	0.857206	1.05392	1.00456	3.56639	2.01778	1.71312	1.46075	0.891614	high
TCGA-BC-A10R	0.843836	1	0.980706	0.977267	2.11988	1.41421	0.66682	1.43825	0.757957	0.622076	0.578293	1.08613	0.614667	1.37673	0.578758	0.395506	0.695746	1.51408	3.71311	0.617823	0.828886	0.627034	high
TCGA-G3-A5SL	1.70137	0	0.897602	0.951285	1.40133	0.910885	0.946414	1.7703	0.523536	0.780556	0.812402	0.22649	1.38473	1.83307	0.372902	0.490959	0.742883	2.13386	1.75501	0.899144	0.662691	0.172787	low
TCGA-CC-A1HT	0.276712	1	3.87299	3.13904	4.63517	4.27132	2.95579	3.48496	3.58584	3.05216	2.95567	3.37107	3.65537	4.90413	2.84895	2.90158	3.21889	5.30264	1.35032	2.71707	2.9486	3.00953	high
TCGA-2Y-A9GV	6.93699	1	1.17551	0.562592	1.70817	0.909014	0.274796	1.05244	0.45499	0.420632	0.486731	0.530421	1.08408	1.43729	0.414085	0.462977	0.78041	1.49181	0.221584	0.819071	0.65203	-0.0936561	low
TCGA-ED-A7XO	1.16986	0	2.23949	1.70863	4.38867	2.71446	1.394	3.78811	1.46369	1.83323	1.95363	1.1374	2.31095	3.19727	1.94758	1.8459	2.32221	3.82364	0.568547	3.77219	3.22281	-0.707544	low
TCGA-CC-A5UC	0.950685	1	3.23593	2.55834	4.15859	2.65252	2.51798	4.4672	2.55693	2.18098	2.65259	0.472355	2.77531	4.09023	1.26299	2.03321	2.60347	4.9403	5.05832	2.22011	1.64954	1.84855	high
TCGA-G3-AAV1	0.983562	1	1.24036	1.23914	2.22898	1.01105	0.958616	1.94321	0.694385	1.12368	0.742522	1.65451	2.0673	2.27614	0.736343	1.05359	1.33817	2.7284	1.51665	1.47194	0.986813	0.416037	high
TCGA-O8-A75V	1.47397	0	1.54752	1.03878	3.10137	1.41455	1.05593	2.29615	0.642805	0.867829	0.886684	1.38353	1.24749	2.02774	0.540745	0.763484	0.866932	3.17	2.13936	1.01744	1.25826	-0.121949	low
TCGA-ZP-A9CY	2.14247	0	0.88083	0.778248	1.68127	1.01653	0.615702	1.09094	0.451794	0.636389	0.598022	1.1902	1.1106	1.64985	0.406401	0.669097	0.758965	1.65285	0.669529	1.44393	0.691068	0.152247	low
TCGA-G3-A7M8	1.17808	0	0.871148	0.310068	1.20722	0.74161	0.51692	0.863376	0.278459	0.378995	0.27367	0.347199	0.630911	0.945509	0.457971	0.324689	0.604314	1.01278	0.202553	1.34831	0.678751	-0.288507	low
TCGA-DD-AAE0	1.52055	0	3.6033	3.22783	4.60218	3.01324	2.53088	4.2397	2.2875	1.88529	2.02221	2.60292	1.91589	3.85528	1.20059	2.41512	2.71996	5.85159	4.5889	2.80413	1.9882	1.30792	high
TCGA-ED-A7PY	1.06849	0	1.40737	1.86949	4.00218	1.24133	1.57076	3.06768	1.30893	1.14299	1.20284	0.89684	1.24411	2.59384	0.38693	1.27138	1.10714	3.46343	3.11286	1.65152	0.686991	0.0585222	low
TCGA-EP-A2KC	0.0520548	1	1.39609	1.39806	2.97445	1.6729	1.12968	2.13646	0.812981	1.16586	1.05559	1.51833	1.86177	3.03835	0.831529	1.11219	1.45555	2.87096	1.62569	1.54393	1.36708	0.0754939	low
TCGA-BC-A10X	2.10959	1	0.547245	0.557396	1.6357	0.570626	0.431261	1.05579	0.36282	0.504918	0.479753	0.600916	0.579702	1.1839	0.335697	0.395545	0.720824	1.37061	0.825659	1.38	0.48794	-0.246303	low
TCGA-CC-A7IH	1	0	0.842014	1.54102	2.93985	1.62575	0.922537	2.32446	0.71892	0.893407	1.08534	0.205534	1.58586	2.19925	0.726892	0.90998	0.915524	2.4111	0.824728	1.84023	1.05584	-0.301984	low
TCGA-FV-A495	0.00273973	0	2.94867	1.1554	4.09585	1.56385	1.86586	3.40843	1.33772	1.17883	1.43035	0.701825	1.61873	2.35061	1.09026	0.999524	1.28703	5.29339	3.81808	3.73465	2.56661	-0.733586	low
TCGA-DD-A1EH	4.09589	0	1.93313	2.94511	2.29717	2.12166	1.33511	3.56571	1.44806	1.95176	2.0634	0.466477	1.19933	3.66141	0.691969	0.962626	1.56329	2.86014	1.39498	1.53098	0.895384	-0.763923	low
TCGA-DD-AAEH	2.14795	0	1.29193	1.13965	2.03863	1.78768	1.12422	2.1286	1.07891	0.906207	0.963506	0.268903	1.27419	2.24466	0.395089	0.585364	0.991683	2.96276	1.70924	0.767928	1.02386	0.522889	high
TCGA-DD-AAEE	2.21918	0	2.02995	1.25663	2.59227	1.73734	1.24089	3.14798	0.94519	1.30006	0.760722	1.07051	2.13358	3.1061	0.624902	1.12764	1.71605	3.90559	0.32697	2.61756	1.59679	-0.626765	low
TCGA-ZP-A9D0	2.98904	0	0.703852	1.1449	1.29212	0.655405	0.535544	1.26457	0.405915	0.68663	0.495191	0.427195	0.886085	1.5049	0.360086	0.531408	0.497213	1.2013	2.75484	0.94036	0.543134	-0.0737741	low
TCGA-DD-A1EG	3.7589	1	2.21502	1.52466	3.36205	2.07592	1.89541	2.41312	1.53158	1.43193	1.23281	1.34246	1.49087	2.4402	0.78157	0.95145	1.97735	3.25268	3.79223	2.27701	1.81398	1.11916	high
TCGA-2Y-A9H6	0.978082	0	1.20619	0.818231	2.05079	0.974577	0.601836	1.60858	0.586332	0.492497	0.53996	0.369675	0.81463	1.63434	0.483034	0.467971	1.01681	1.97141	3.08156	1.27414	1.09062	-0.147634	low
TCGA-2Y-A9GW	3.48219	1	1.36367	1.09325	2.21623	1.58027	0.936988	2.046	0.803667	0.96181	1.13569	1.498	1.30736	1.89376	0.666061	0.675898	1.29183	2.5542	1.34873	1.83701	1.32704	0.305791	low
TCGA-DD-A73D	1.89863	0	1.03458	0.911508	1.64958	1.25955	0.896863	1.43228	0.897263	0.692672	0.534779	0.73309	0.971006	2.29534	0.303946	0.55703	0.730456	1.82028	0.214469	1.368	0.740182	-0.230892	low
TCGA-DD-A115	6.96438	1	2.81347	1.95016	2.70862	2.43663	1.71584	3.49925	2.16703	1.68395	1.70028	1.94697	2.95818	3.20743	1.24958	1.52503	1.81443	4.42717	0.587346	2.71187	1.91493	1.02678	high
TCGA-XR-A8TF	1.89863	1	1.2986	1.40402	2.26357	1.05665	1.13111	2.61505	1.0924	0.964269	0.838382	0.414298	1.60896	2.16228	0.852168	0.764219	1.00422	2.74864	0.270615	1.06982	0.668079	-0.323742	low
TCGA-DD-A4NI	2.23562	0	0.544993	0.520924	1.53779	0.660461	0.503615	0.783103	0.319429	0.446298	0.395182	0.574079	0.686949	1.12038	0.40176	0.370988	0.527846	1.3286	0.440855	1.08989	0.504245	-0.120667	low
TCGA-G3-AAV3	1.12877	0	2.17281	1.49244	2.13524	2.30313	1.81583	2.69816	1.00539	1.66547	1.6533	0.3382	2.1023	2.95023	0.974926	0.812036	1.53132	3.09893	1.04361	2.23131	1.71455	0.196476	low
TCGA-UB-A7MA	2.32329	0	2.89833	2.30105	3.97899	3.16879	2.1839	3.24816	3.44795	2.6613	2.65353	3.02568	2.08058	4.86563	1.94833	1.74801	2.42333	4.39796	2.26702	2.23563	2.53085	1.43111	high
TCGA-UB-A7MF	0.586301	1	2.49098	1.84396	3.61992	2.6939	1.84878	3.77994	1.9292	1.42987	2.0433	2.65828	1.26857	3.58322	1.70084	1.49529	1.78357	4.2028	3.79555	3.14454	1.40749	0.524496	high
TCGA-BC-A112	0.419178	1	2.57729	2.72967	3.03969	2.57266	1.82195	2.15843	1.38979	1.68419	1.86958	3.11829	1.93504	3.64356	0.850426	1.62665	1.95246	3.51861	2.51253	2.37585	2.21138	0.846069	high
TCGA-BC-A10U	2.29315	1	1.49921	1.2442	2.43676	2.02988	0.875248	2.26565	0.9146	1.0014	0.795927	2.21883	1.24234	1.61188	0.788368	0.808572	1.23154	2.53814	2.77732	1.45634	1.05852	1.01499	high
TCGA-BC-A5W4	1.49863	1	1.07986	0.907566	2.48809	1.70607	0.831879	3.49652	1.10279	1.158	1.62084	1.67833	1.24423	1.56056	0.352318	0.511297	1.2307	3.39351	0.484453	2.65776	0.700282	0.381921	high
TCGA-FV-A3I1	0.676712	1	2.3585	1.82999	2.63366	2.599	1.36429	2.77951	1.42557	1.67316	1.6887	1.77168	2.3496	3.44795	0.978169	1.51299	1.74051	2.9846	4.05402	1.9015	1.90176	1.25792	high
TCGA-CC-A123	0.6	0	2.93126	0.519163	3.39793	1.37051	1.52662	3.09075	1.56571	1.02241	1.10537	0.799546	0.720546	2.08303	0.520613	0.980268	1.4259	4.95339	1.33794	1.97448	0.691391	0.0534489	low
TCGA-WQ-A9G7	0.0821918	0	2.88916	3.14094	5.05101	2.69364	2.29101	3.64446	2.88395	2.20134	2.00453	2.70413	1.99369	3.22832	1.21641	2.25424	2.3308	5.47073	3.31733	1.90359	2.22858	1.73571	high
TCGA-ED-A66X	1.11233	0	2.13279	2.17398	3.48874	2.22447	1.50947	3.03019	1.41824	1.68378	1.86747	0.676282	2.14252	3.6429	0.945004	1.72328	2.29569	3.07267	3.71001	1.65614	1.26503	1.02125	high
TCGA-DD-A1EK	1.52877	1	1.32669	1.14948	1.85911	1.62393	0.856541	2.20864	1.19209	1.00932	1.05652	1.22486	1.36996	1.91157	0.77634	0.56657	0.849097	2.67416	0.754774	1.33922	0.986347	0.332134	low
TCGA-DD-AADM	0.0328767	1	1.94743	1.21605	3.24498	1.59847	1.5359	2.59561	1.16361	1.1114	1.04074	0.799456	1.84032	2.17365	0.642992	0.985291	0.754549	4.85337	2.27996	2.10895	1.2351	0.387503	high
TCGA-MR-A8JO	0.90411	0	0.967613	0.818182	1.74224	1.16119	0.799581	1.75209	0.498266	0.788324	0.884067	0.751861	1.02236	1.61708	0.510854	0.667615	0.823068	2.32891	1.38061	0.988402	0.951235	0.108705	low
TCGA-QA-A7B7	0.257534	0	3.48121	2.91001	4.83893	3.81019	2.41735	4.52656	2.57965	3.24838	3.15148	2.20438	3.6224	5.12185	2.50254	2.90436	3.17395	4.95471	0.350442	3.22678	3.07491	0.960929	high
TCGA-CC-A8HT	0.383562	1	3.58036	3.38219	5.29969	3.95881	3.13621	3.90369	3.53312	2.97335	2.31594	3.25836	2.71257	4.3006	1.9072	3.06506	2.82192	5.63249	3.37763	2.7165	2.28909	2.99586	high
TCGA-FV-A4ZP	6.81096	1	4.00647	0.826368	4.22004	1.67696	1.95706	2.31059	2.42657	1.10092	0.926401	1.21355	0.826958	1.40842	0.508002	0.825626	1.37637	5.42507	5.14565	3.70208	3.22206	0.534185	high
TCGA-DD-A4NJ	2.54247	0	3.14951	2.67318	2.92056	3.00111	1.80846	3.56507	2.41105	2.25643	2.77941	2.66866	3.62088	4.71194	2.17598	1.44734	2.7388	3.8595	0.795787	2.33499	2.0818	1.25766	high
TCGA-CC-5258	0.353425	1	2.74998	2.31227	3.40529	2.77075	1.93971	2.98715	2.116	2.51449	2.32281	2.5933	2.72361	3.77275	1.23131	2.2895	2.37586	3.77434	3.98011	1.54562	1.08178	2.89204	high
TCGA-EP-A2KB	1.63288	1	2.58699	1.85595	3.81193	2.29314	1.84099	3.18848	1.4204	1.63682	1.61983	0.996968	2.1212	3.65474	0.747788	2.06041	1.93481	4.43302	0.190581	1.29741	1.17892	0.505984	high
TCGA-G3-A25X	4.87397	0	3.06358	1.46592	4.36523	2.21603	2.43165	4.50681	2.21297	1.67798	1.88692	1.57275	1.04256	3.30495	1.3019	1.0605	2.08229	4.99396	3.6448	2.95772	2.57536	-0.503455	low
TCGA-CC-A5UD	0.832877	1	3.26544	3.29911	4.02195	3.28839	2.75417	4.98028	3.23075	2.89172	3.08539	0.575739	3.69674	4.84041	1.80654	2.31055	3.50723	5.01032	2.89716	3.64951	3.34679	1.42845	high
TCGA-DD-A119	0.610959	1	1.29666	0.662365	1.93822	1.02766	1.10751	1.68513	0.86035	0.688041	0.738345	0.703542	0.744716	1.28813	0.397193	0.574948	0.743436	3.55476	1.60591	1.0573	0.842467	0.437094	high
TCGA-DD-AACB	6.36712	0	2.31671	1.05223	3.02926	2.22986	1.90772	3.49911	1.49489	1.4943	1.62774	1.15818	1.34865	3.04615	1.00879	1.16972	1.82641	4.00957	3.64421	2.12941	1.31362	0.747189	high
TCGA-DD-AAE4	1.66575	0	3.05193	0.732825	3.98113	1.10038	1.27884	2.88268	0.760985	0.78226	1.08348	0.742841	1.47149	2.03887	0.880601	1.04535	1.37298	4.35156	0.212308	3.38409	1.25694	-1.21026	low
TCGA-CC-A3M9	0.821918	1	3.72503	3.6193	4.97107	4.58578	2.77257	5.10621	3.96103	3.31871	4.51269	1.10759	2.6779	4.97681	3.45205	2.87998	3.57111	5.80691	3.32861	2.62603	2.95811	2.39458	high
TCGA-CC-A7IL	0.761644	1	1.74658	1.21834	2.58129	1.42879	1.13725	2.37442	0.806918	1.12447	1.11389	0.209544	1.80179	2.51248	0.545508	0.75279	0.947188	3.39315	1.14681	1.69353	1.47682	-0.482092	low
TCGA-BC-A10Z	0.0931507	1	1.71815	0.753015	2.65567	2.08704	1.36403	2.12281	1.10154	1.46194	0.91338	2.50822	2.39918	3.7212	0.876851	1.28312	1.76477	2.80752	1.03058	2.99349	1.11816	0.76163	high
TCGA-UB-AA0U	0.89589	0	2.35082	2.4747	2.43712	2.1113	0.93643	2.63721	1.42205	2.02301	2.10202	0.544038	2.44929	4.21973	1.91959	1.17071	2.48457	3.16247	3.27978	2.46993	1.64548	-0.02817	low
TCGA-DD-A3A8	0.030137	1	0.86109	0.797004	1.65136	1.05935	0.906475	1.51609	0.398718	0.592812	0.590496	0.305083	1.50203	1.3668	0.423377	0.365189	0.625025	2.16403	2.63332	0.979313	0.751304	0.622367	high
TCGA-ED-A4XI	2.24384	0	0.746582	0.563829	1.5481	0.837233	0.496082	1.02178	0.439769	0.478079	0.470663	0.773051	0.794477	1.35663	0.353475	0.482431	0.639223	1.49573	2.94346	0.88904	0.636904	0.46939	high
TCGA-HP-A5MZ	0.249315	1	1.064	0.874795	2.02905	1.2776	0.924088	2.21625	0.826937	0.711271	0.804774	1.35783	1.28652	1.72398	0.471909	0.613107	0.763789	2.66986	1.6077	1.30491	0.958624	0.295051	low
TCGA-DD-AAVU	6.03288	0	2.28936	0.947688	3.22095	1.29679	1.74117	2.7602	1.34442	1.35598	1.24765	1.72098	1.38259	2.17561	0.612054	1.11903	1.0112	3.73048	0.735205	1.56131	1.04903	0.20189	low
TCGA-DD-AAD6	1.8411	0	1.68697	1.18097	3.71788	2.18501	1.55157	2.53545	1.59426	1.33423	1.2073	2.58296	1.57122	4.18416	2.1157	1.28052	2.28008	3.78634	1.67943	2.64765	1.71657	-0.168981	low
TCGA-DD-A4NE	1.80822	1	3.24395	2.80373	4.12036	3.27946	2.54625	4.25626	2.53579	2.76045	3.14514	1.23188	3.13813	4.79529	1.7324	2.58052	2.14754	4.2032	1.09717	2.17505	1.4253	1.45968	high
TCGA-DD-AADV	1.5726	0	2.78543	1.84076	3.27583	2.48482	1.49554	3.13681	1.39708	2.17253	1.9583	1.3897	2.64334	2.93995	1.84973	1.67754	2.18447	3.40009	1.34772	2.81855	2.21674	0.490585	high
TCGA-DD-AACX	0.465753	0	2.52911	2.25905	3.33378	2.50582	1.95741	2.94063	1.51484	1.6653	1.98642	1.33784	2.39525	3.9254	0.996521	1.47778	1.49211	3.43759	4.13461	2.1997	1.93357	0.727707	high
TCGA-DD-AACC	4.61644	1	2.19205	1.2244	3.31813	2.07737	1.86604	3.02529	1.36354	1.23773	1.50195	0.236524	2.0131	2.6006	0.792265	1.07468	1.42451	4.25416	2.80277	1.45021	1.02041	1.16556	high
TCGA-G3-A5SK	2.03836	0	0.355985	0.398896	1.31872	0.443237	0.31478	1.09711	0.261814	0.285538	0.3199	0.206151	0.460833	0.619962	0.313995	0.325139	0.337577	1.20421	0.245105	0.892739	0.425316	-0.36035	low
TCGA-ZS-A9CE	3.4	0	1.09117	1.29361	2.53025	1.50679	0.659082	1.96862	0.733055	0.847301	0.849594	0.789303	1.57282	1.79131	0.387818	0.576709	0.97972	2.72856	0.393288	1.92792	0.774632	0.105971	low
TCGA-DD-A73B	0.775342	1	2.46355	2.22031	4.37512	2.30353	1.84595	4.11169	2.89424	1.76051	2.5729	2.68642	2.99435	4.69878	0.518483	2.00801	2.15845	3.74892	0.214233	2.53291	0.941451	1.43574	high
TCGA-RC-A7SB	1.61096	0	2.00597	1.27655	4.06505	1.92375	1.7868	3.0574	1.32491	1.22661	1.41816	2.0346	2.05491	2.42997	1.13547	1.15412	1.66608	3.09454	0.376855	1.90683	1.16336	0.623833	high
TCGA-DD-AADN	2.46027	0	3.0895	0.974216	3.3821	2.4589	1.58659	2.48997	2.59094	1.23196	1.42121	1.34171	1.39642	1.80147	1.09779	1.40913	1.71772	5.08285	1.32964	3.89166	1.86621	1.57616	high
TCGA-CC-A5UE	0.745205	1	3.52487	2.33485	4.22934	4.19848	2.9188	4.33984	2.52454	2.9616	2.6813	3.4246	3.47228	4.54319	2.10414	2.75683	2.61544	4.94349	3.05967	2.72743	2.19446	2.88726	high
TCGA-DD-AACZ	0.468493	1	2.66972	2.09351	3.80563	2.82041	2.31043	3.35555	1.76181	2.28905	2.12954	3.12731	2.41263	3.58481	1.32912	2.19657	2.38532	3.88458	3.67488	1.66094	1.26492	2.40724	high
TCGA-DD-AAVQ	7.47397	0	2.55755	2.42037	4.2246	2.30062	1.98156	4.11549	1.81879	1.81899	2.08864	0.455024	1.87452	3.3282	0.861182	1.74349	2.03985	4.16163	3.97904	1.74655	1.95401	0.453517	high
TCGA-BD-A3EP	1.12055	0	1.6167	0.934816	2.71734	1.68173	0.989605	2.69384	0.882078	1.04152	1.25283	1.57673	1.26239	2.29005	0.857886	1.04675	1.1969	2.56937	2.74747	1.06857	1.08923	0.389496	high
TCGA-DD-A39V	1.76164	1	1.64605	0.683983	2.78413	0.907652	0.969456	2.18905	0.879852	0.624557	1.14265	0.722675	0.933539	1.46937	0.512359	0.686612	1.01125	4.04176	0.217296	1.8464	0.82192	-0.205879	low
TCGA-NI-A4U2	4.90685	1	0.465358	0.461032	1.87448	0.743018	0.523343	1.26517	0.443105	0.464137	0.489367	2.10628	0.827084	0.998714	0.358665	0.470695	0.357044	1.84727	0.182293	1.07796	0.615796	0.132655	low
TCGA-DD-A4NF	2.58082	0	0.532889	0.567296	1.35342	0.490304	0.387215	0.572051	0.215094	0.305113	0.303242	0.403517	0.649103	0.822102	0.274456	0.451894	0.480678	0.912192	2.41558	0.675714	0.470052	0.385469	high
TCGA-DD-A11A	0.216438	0	2.51887	1.64271	2.59076	1.80268	1.51721	2.31668	1.11469	1.42046	0.799793	2.60273	1.54662	3.57035	0.868221	1.3591	1.67152	1.85366	0.190942	1.13497	1.97635	-0.746099	low
TCGA-DD-AAD0	0.375342	0	2.4334	2.19237	2.73162	1.90527	1.78288	3.44458	1.68589	1.77371	1.86264	0.565131	2.2867	3.79204	1.1793	1.41958	2.10755	3.30718	0.11492	2.05364	1.82631	-0.427763	low
TCGA-DD-A3A6	8.92603	1	0.741987	0.462602	3.82772	0.725191	0.744094	0.702349	0.812551	0.552017	0.559295	0.55608	0.376749	1.07983	0.472528	0.335256	0.615969	2.4469	0.377711	0.961493	0.573088	-0.0821609	low
TCGA-DD-A114	3.14795	1	2.85982	3.81223	4.05609	3.82399	2.58727	4.69188	2.48294	3.2409	3.26252	2.98849	2.54189	4.30717	2.57532	1.8115	3.06306	4.88395	1.80642	3.00059	2.44001	0.993434	high
TCGA-5C-AAPD	0.0547945	0	2.38472	1.91713	4.57055	2.99668	2.55904	3.34471	1.91382	2.17627	1.38855	1.76164	2.01875	3.42011	1.81335	1.62994	2.6286	4.44409	0.519779	3.21261	2.83649	0.211565	low
TCGA-HP-A5N0	2.06027	1	0.545417	0.468597	1.40366	0.983531	0.301269	1.06212	0.223293	0.378717	0.311217	0.238592	0.446376	0.758272	0.270067	0.327044	0.657843	1.07244	0.617089	1.33979	0.545049	-0.0977207	low
TCGA-T1-A6J8	0.0630137	0	0.666936	0.400072	1.75449	0.736635	0.306326	1.24964	0.279388	0.397265	0.30064	2.20942	0.506347	0.680307	0.333418	0.352357	0.971294	1.07477	3.78549	0.926841	0.460716	0.904117	high
TCGA-XR-A8TC	3.66849	0	1.81601	2.40249	3.38064	1.51732	1.49827	3.06648	1.18086	1.46937	1.56462	1.10802	1.72353	3.15985	0.802721	1.54544	1.83983	2.68812	2.19572	1.61704	0.997997	-0.0205824	low
TCGA-DD-AACK	0.0246575	0	1.61966	1.09678	2.56276	1.88182	1.23139	2.53402	0.948719	1.12971	1.38616	1.46464	1.8243	2.74114	0.688634	1.06933	1.25565	2.53969	2.88138	2.01467	1.09728	0.758234	high
TCGA-MI-A75C	0.79726	0	1.46362	1.53464	3.01203	1.75279	1.39203	2.72875	0.838621	1.03782	1.24571	1.4628	1.03334	1.88674	0.742457	0.733119	0.860644	2.72215	4.79892	1.92431	1.26153	0.378608	high
TCGA-DD-AACP	1.13699	0	3.30346	3.32015	4.30022	3.1983	2.65633	5.99466	2.51539	2.60973	2.63528	1.99177	2.31489	4.2901	2.10422	2.54682	3.10177	5.16712	2.32751	3.04435	2.45079	0.116571	low
TCGA-DD-AACT	4.27945	0	1.23603	0.962619	2.57611	1.72562	1.07049	2.06588	0.850466	0.951715	0.900717	0.277448	1.34417	1.97077	0.629126	0.459358	1.13464	2.707	1.09581	1.8279	1.20338	0.0591776	low
TCGA-DD-A73E	0.120548	0	1.66287	0.82538	1.93245	1.39913	0.990453	1.51734	0.55021	1.02003	0.611636	0.158825	1.2304	2.0721	0.557164	0.480076	1.30993	1.83767	0.23033	1.69726	1.0582	-0.378063	low
TCGA-BC-4072	4.08219	1	2.59632	1.95971	3.49042	2.88143	2.20897	2.72326	2.07914	2.34676	2.43337	2.61068	2.45592	4.59447	1.40877	1.68022	2.05974	3.67613	1.45449	2.69648	1.87418	1.16181	high
TCGA-BC-4073	2.32603	0	2.47691	2.25348	3.00946	2.5998	1.88567	3.36217	1.74942	2.23019	2.74114	1.35962	2.62774	4.52463	1.58765	1.91658	2.36135	3.68642	3.82982	2.53175	1.70083	1.1848	high
TCGA-XR-A8TG	2.46027	0	2.48982	2.57561	3.59859	2.64563	1.85004	2.75004	1.42794	2.10791	1.76845	1.74484	3.02897	4.25402	1.70418	1.75248	2.4623	3.84625	2.15147	2.8115	2.0642	0.607747	high
TCGA-RC-A6M6	0.0246575	0	3.18824	1.73503	3.49286	3.22304	2.49678	3.20497	2.06186	2.71144	3.10022	1.62393	2.89923	3.65657	1.85236	1.91342	2.38648	4.84047	4.45674	2.76706	1.92739	2.82586	high
TCGA-BC-A69H	1.21644	0	3.50467	1.27224	4.27731	2.02758	2.00466	3.12628	1.89455	1.50482	1.70822	0.842052	1.8563	3.0639	1.09217	1.41462	2.30897	5.25855	5.88369	2.82872	2.38494	1.0039	high
TCGA-DD-AAC8	0.0438356	1	1.1341	0.893064	1.93369	0.89449	0.70612	1.79018	0.612768	0.629519	0.689919	0.415913	0.853486	1.62331	0.522454	0.44153	1.01372	2.49694	2.47593	1.39819	0.75308	-0.106491	low
TCGA-DD-AADJ	2.92055	0	1.56546	0.952017	2.9941	0.892393	1.36604	3.0252	0.893447	0.590812	0.895393	1.19172	0.709247	1.76584	0.350947	0.595973	0.798231	3.21918	0.906971	1.45301	0.746855	-0.782903	low
TCGA-2Y-A9H9	1.90959	0	1.32537	0.954666	2.39401	1.45478	1.06958	2.04502	0.571826	0.938346	0.736157	1.2166	1.93601	2.0916	1.03492	0.730346	1.01792	3.16373	0.250207	2.10972	1.39896	-0.260679	low
TCGA-ED-A5KG	2.33973	0	2.42344	2.55686	3.26688	2.47968	2.29719	3.26801	1.80369	2.60367	2.32724	1.96178	1.99085	3.90192	1.09792	1.38172	2.07826	3.73221	0.913806	2.07554	1.4426	0.548307	high
TCGA-DD-AACO	5.13973	0	2.75778	0.78822	3.48558	1.4395	1.13553	2.92743	1.3006	0.878505	0.833504	1.29426	1.19617	2.16422	0.467972	0.718065	1.4753	4.50615	4.21118	2.76454	0.493118	0.50421	high
TCGA-G3-A25Z	1.79452	0	0.918934	0.683693	2.80035	1.27868	1.2729	2.45642	0.880942	0.9068	0.81297	1.50198	1.3576	2.20694	0.75768	0.649694	0.809508	2.72796	0.369346	1.30029	1.3707	-0.421618	low
TCGA-DD-A4NV	6.56986	0	1.03293	0.651072	2.21938	1.19202	0.587961	0.951527	0.367662	0.532478	0.467463	0.548854	0.926008	1.22398	0.494002	0.63044	0.613128	1.45686	0.428424	0.973766	0.807372	0.0404139	low
TCGA-FV-A2QR	1.59178	1	1.53172	1.45507	2.47888	1.94546	1.29001	2.65185	1.19239	1.24022	1.24373	1.8225	1.70751	2.3393	0.601391	0.607785	1.11391	2.77745	1.64952	1.89185	0.992905	0.639187	high
TCGA-G3-AAV7	0.989041	0	3.10982	4.28086	6.09996	4.18215	2.74359	4.38821	3.18977	3.27759	2.84021	2.46727	3.74996	5.88683	2.60028	3.19516	3.71642	5.32469	3.69264	2.7376	2.72763	2.0449	high
TCGA-2Y-A9H4	3.97808	0	1.77521	0.986588	3.01493	1.70743	1.12811	2.61945	1.40071	0.609645	1.12916	2.24878	2.06055	2.17424	0.797523	0.711895	1.64679	3.29761	0.569182	2.89603	1.41705	0.647351	high
TCGA-3K-AAZ8	1.08493	0	0.716116	0.463664	2.04876	0.724962	0.484945	1.03909	0.296938	0.381262	0.396863	0.21188	0.511895	0.954304	0.368753	0.428795	0.504351	1.81531	3.29903	1.59951	0.808744	0.0162625	low
TCGA-CC-5261	0.265753	1	2.14006	3.23706	3.31807	2.28735	1.61593	3.84783	1.95769	2.09526	2.91585	1.79437	1.86322	4.7962	1.2899	1.9522	2.86216	3.40539	4.7276	2.47664	1.12157	0.800632	high
TCGA-ZP-A9D2	2.09589	1	2.46707	2.7587	3.74597	2.56553	1.41577	2.22775	1.69218	1.9556	1.64658	4.62954	2.42418	3.92038	1.56602	1.87318	2.16645	3.39023	2.60724	2.21753	1.93159	1.1765	high
TCGA-2Y-A9H5	1.52055	1	1.7657	1.80633	3.16321	1.72381	1.12423	2.50427	1.28787	1.39688	1.47617	1.1167	1.23238	2.45036	0.708452	1.41033	1.23908	2.77269	3.52042	1.44607	1.48857	0.419016	high
TCGA-G3-A25T	4.25479	0	2.97299	1.6561	3.52055	2.51476	2.07282	2.81119	2.36448	2.09708	1.73055	3.12212	1.80353	3.24281	1.98374	0.982303	1.91428	4.44379	3.38728	3.49012	2.86617	0.574004	high
TCGA-DD-AAEA	1.57534	0	2.40891	1.97878	3.95792	2.56822	1.97906	3.77403	1.65813	1.27563	1.39576	0.534056	1.73508	3.63404	0.940312	1.33593	2.85759	3.62367	0.525538	2.73287	1.17673	0.102082	low
TCGA-RG-A7D4	3.00822	0	2.51942	2.3465	4.54071	2.48515	2.87134	3.465	1.98789	2.51088	2.10005	1.04135	2.94466	4.53851	1.62289	2.44854	3.00517	5.02632	3.25125	2.54723	2.72465	1.12702	high
TCGA-DD-AACD	1.04384	1	1.45525	0.574842	1.80258	1.00019	1.29923	1.95374	0.537078	0.57888	0.688823	0.389934	0.994845	1.32606	0.430482	0.413967	0.585783	3.29948	1.66552	1.99408	0.866573	-0.0779706	low
TCGA-DD-AAD8	3.33973	0	1.68906	1.99028	4.10526	2.32671	2.3862	3.3336	1.76039	1.46631	1.12555	1.32063	1.59523	3.14516	1.50375	1.32484	2.00913	3.14794	3.38923	3.27096	1.79059	0.305836	low
TCGA-5R-AAAM	0.126027	1	0.83606	0.574717	2.04027	0.90822	0.510055	0.954458	0.399569	0.560227	0.435087	0.503972	0.905857	1.4277	0.342985	0.388752	0.71085	1.41324	1.37433	0.808221	0.618723	0.0937467	low
TCGA-EP-A3JL	0.830137	0	1.94124	1.4228	2.96176	1.80837	1.18662	2.84319	1.10224	0.869588	1.07351	0.828111	1.35579	2.22378	0.797751	0.898879	1.56615	3.21763	2.27154	2.1412	1.74972	-0.147701	low
TCGA-DD-A73G	9.52877	0	2.24319	0.823869	2.45182	1.03328	1.09852	2.13429	0.88312	0.670918	0.792649	0.453327	0.659114	1.0564	0.457931	0.448302	0.646075	3.82986	4.40767	2.49685	1.2969	-0.0342086	low
TCGA-G3-AAV4	0.0739726	1	1.42154	1.21493	1.78777	1.89253	1.27086	2.26978	1.38335	1.48936	1.59518	0.188667	2.20817	2.68691	0.449123	0.83116	1.48005	3.13179	0.302421	1.03487	1.12291	1.19203	high
TCGA-ED-A459	2.49315	0	2.64667	2.2045	2.51806	2.70033	1.80498	3.36502	1.69476	1.50748	1.30696	2.82813	2.53258	3.48597	1.71527	1.7917	2.27811	3.79531	0.617505	2.43259	2.43797	0.461216	high
TCGA-DD-A73C	1.92055	0	0.834212	0.731861	1.4796	1.18994	0.575438	0.812394	0.418929	0.635935	0.501471	0.444572	0.92064	1.73009	0.414699	0.553766	0.6354	1.2149	0.117669	0.942969	0.749353	-0.0954455	low
TCGA-MR-A520	0.627397	0	0.440696	0.34908	1.4411	0.473057	0.473209	0.90573	0.216889	0.400013	0.331938	0.377411	0.695886	1.01321	0.333648	0.302765	0.51158	0.957933	0.189323	0.708438	0.43723	-0.254411	low
TCGA-G3-A7M5	1.22466	0	1.08872	0.317187	2.18417	0.785666	0.516636	1.57668	0.447976	0.467817	0.324773	0.557819	0.862615	0.809888	0.386532	0.351021	0.746405	2.05754	0.113225	1.42635	0.749245	-0.307249	low
TCGA-MI-A75G	1.91233	0	0.936605	0.458817	2.59553	1.08997	0.726258	1.73832	0.37473	0.493623	0.638954	0.215401	0.71509	0.763748	0.412495	0.451691	0.766112	2.06079	0.427484	1.08622	0.847321	-0.120657	low
TCGA-CC-A7IK	0.717808	1	1.80144	2.46099	3.49386	3.34765	1.89682	3.30485	1.97839	2.81304	2.21447	0.282666	2.9402	4.68941	1.05313	2.48048	2.1392	3.93535	0.322593	2.12843	1.61295	1.27935	high
TCGA-G3-A5SJ	1.91233	0	1.59542	1.4614	3.62188	2.66222	1.58695	2.41953	1.54158	1.66714	2.0254	2.50231	2.08412	3.5382	2.00284	1.3093	1.77379	3.44079	4.31077	2.41994	2.00392	1.3349	high
TCGA-DD-AADC	1.16438	1	3.03531	3.70045	4.3618	3.60911	2.74058	4.92572	2.26908	2.91733	2.78434	1.21327	4.41531	3.58511	2.93209	3.14125	2.88286	5.36863	2.1606	3.27151	2.6001	2.07102	high
TCGA-DD-A3A7	1.14795	1	2.03252	1.0958	3.38507	1.63717	1.89739	2.436	1.61996	0.98283	1.57155	0.904898	1.04444	2.49503	0.629402	0.710513	1.08523	5.33029	3.49291	2.17811	1.28614	0.721488	high
TCGA-DD-AACE	5.98356	0	1.29556	1.34083	2.22751	1.49677	0.623347	1.08226	0.545429	0.583221	0.653476	0.230532	1.6087	2.35163	0.636954	0.600908	0.935476	2.20729	0.253582	1.6265	0.962383	-0.30312	low
TCGA-2Y-A9H3	4.15342	0	1.39266	0.433486	2.42253	0.694234	0.760997	1.11136	0.509232	0.432386	0.543906	0.487774	0.515555	1.10741	0.381033	0.514245	0.607172	2.53262	2.16024	1.30691	0.889573	-0.108459	low
TCGA-DD-A4NB	2.70959	0	0.799942	0.687871	1.76359	0.760282	0.542089	0.994493	0.290035	0.651707	0.569075	0.749651	0.810813	1.39152	0.451107	0.521175	0.577675	1.3928	1.29383	0.583947	0.57743	-0.0318578	low
TCGA-G3-A5SI	2.10411	1	2.48057	2.35288	3.90178	2.88541	2.37785	4.55403	1.80903	2.17982	2.21229	0.375592	2.55589	3.70571	1.42993	1.92987	2.51339	4.26321	0.235529	3.24507	1.56714	0.357434	high
TCGA-DD-AAE6	0.386301	0	3.27665	2.52655	4.34858	3.408	2.08911	4.07992	2.13065	1.52836	1.32627	0.552386	2.21945	3.84969	1.43207	1.61332	2.18014	4.80451	5.28367	2.16473	1.72499	1.0367	high
TCGA-DD-AACG	1.28493	1	3.45436	0.966418	4.69458	2.09956	2.21354	3.4032	2.18643	1.56272	1.61814	1.69101	1.98598	3.02951	0.885243	1.79294	1.70717	5.8514	3.15356	1.85969	1.01931	1.68078	high
TCGA-5C-A9VG	0.89863	0	2.83494	2.98994	4.00581	2.85211	1.43246	2.71939	1.19421	1.87408	2.16793	0.267028	2.83203	3.56007	0.530308	1.84436	2.09991	3.78357	3.98308	2.13112	1.74363	1.30446	high
TCGA-DD-A1EE	0.956164	1	1.65257	2.04109	1.73857	2.00601	1.29317	2.50107	0.796499	1.52073	1.26358	0.426567	2.1723	2.68073	0.846739	0.713713	1.37835	2.81318	4.39213	1.4466	1.03245	0.917624	high
TCGA-BC-A110	5.79726	1	0.369351	0.268149	1.84181	0.434899	0.442534	1.14051	0.193263	0.295613	0.172822	0.721852	0.345374	0.573684	0.297229	0.240716	0.360235	1.26043	0.665574	0.774035	0.601921	-0.436511	low
TCGA-GJ-A3OU	2.40822	0	2.01243	1.71104	3.05744	1.82174	1.47242	3.43355	1.71314	1.75926	1.6595	1.08469	2.0048	3.05525	0.748645	1.24631	1.5062	3.80855	1.55287	1.49301	1.58655	0.252755	low
TCGA-G3-A25U	4.48219	0	2.40463	1.27228	2.86272	2.49675	1.54506	2.4882	1.25278	1.59307	1.48137	1.30259	2.44586	3.69936	1.74661	1.43782	1.92271	3.00058	0.111288	2.35359	1.63614	0.230055	low
TCGA-G3-A3CG	1.84384	0	1.3917	0.872884	2.04604	0.968057	0.672563	1.629	0.344928	0.57209	0.661053	1.70254	1.1261	1.31389	0.419591	0.607087	0.645413	2.05989	2.65384	1.42152	0.655217	0.302722	low
TCGA-CC-5260	0.238356	1	3.14643	2.65141	2.76509	3.15279	2.00406	2.09606	1.85911	2.52769	2.14676	4.60022	2.03997	4.15218	2.63791	1.38013	2.72515	3.00423	3.76227	2.30894	2.93914	1.12762	high
TCGA-CC-A7IJ	1.04658	0	3.94938	3.47745	5.82951	4.14341	3.963	4.64566	4.2328	3.7933	3.71286	2.88781	2.00445	4.72046	2.57788	3.19616	2.56683	5.74565	2.62512	3.63084	2.96975	2.09799	high
TCGA-DD-AADU	1.51781	0	0.339804	0.416467	3.05371	0.619906	0.412977	0.94805	0.447393	0.412484	0.287894	0.813925	0.922997	0.879407	0.283819	0.39888	0.269403	2.37642	1.50113	0.47422	0.536781	0.275659	low
TCGA-DD-AAE1	1.51233	0	1.60624	1.59002	2.97023	1.40777	1.13324	2.57629	0.749478	0.836982	1.03605	1.2683	1.22702	2.34849	0.486781	1.2592	1.38401	2.71088	0.661129	1.24012	0.741031	-0.171865	low
TCGA-2Y-A9HB	0.712329	0	1.07784	1.0594	2.10845	1.16761	0.895177	1.53181	0.492422	0.844554	0.883298	0.257926	1.34545	1.73856	0.561605	0.609403	0.559322	2.44396	0.6966	1.12419	0.953376	-0.181999	low
TCGA-BD-A2L6	3.73425	0	2.81947	1.56751	4.97334	2.64599	2.23359	3.81906	2.05982	1.59351	2.1733	0.79415	2.52899	3.86487	1.65904	2.20144	2.90006	4.3951	0.607333	3.1601	2.08759	0.692689	high
TCGA-DD-A3A9	2.55068	1	1.59744	0.933949	3.77349	1.22829	0.831474	1.84845	0.784934	0.604961	0.750496	0.884161	0.728094	1.52421	0.536173	0.54091	0.954322	2.62565	4.89053	1.75762	0.852442	0.314374	low
TCGA-KR-A7K2	2.27123	0	1.31265	1.27725	3.05311	1.47351	1.12285	2.45769	0.850916	0.840279	0.906523	0.468591	0.981624	1.96126	0.471084	0.786478	1.09796	2.89902	3.54582	1.86424	1.30043	-0.0335661	low
TCGA-CC-A3MC	0.994521	0	2.20097	2.52386	3.72756	2.311	1.43563	3.63748	1.60964	1.82488	1.67406	2.02169	2.45891	3.42389	1.29006	1.56072	2.07445	4.21153	2.69758	2.17275	2.32672	0.190867	low
TCGA-DD-A73A	1.99452	0	1.53928	0.73595	2.12797	1.81475	1.04249	1.56497	0.743231	0.80273	0.710941	1.32976	1.76829	2.25358	0.665134	0.803777	1.12139	2.56275	2.31002	1.50168	1.06042	1.014	high
TCGA-DD-AADG	3.13699	0	1.27405	0.813249	2.5572	1.35564	0.989499	1.30993	0.462495	0.696479	0.685765	0.118342	1.62522	1.98971	0.842971	0.542517	1.17929	2.37398	0.255693	1.85381	1.16196	-0.187985	low
TCGA-DD-A4NL	4.68767	0	0.443459	0.352008	1.133	0.448234	0.35602	0.737067	0.201588	0.329557	0.233449	0.631594	0.786191	0.858916	0.283587	0.342475	0.391025	0.918871	0.27278	0.660647	0.569777	-0.10252	low
TCGA-BC-A10Q	3.10959	1	2.15915	2.77882	2.36502	2.72755	1.57298	2.3886	2.24202	2.64839	2.00461	4.23149	2.23794	4.28505	1.41527	0.919719	1.75332	3.6821	2.25223	1.88174	2.00934	1.03881	high
TCGA-2Y-A9GU	5.31233	0	1.46879	2.21993	2.18395	2.1203	0.614486	3.05361	1.38014	1.11399	1.62654	1.62083	1.70743	2.23655	0.739285	1.38429	1.02662	2.97574	1.69993	1.49839	0.814603	0.830192	high
TCGA-ZP-A9CV	2.98082	1	1.58337	1.0341	1.99855	1.31659	0.877996	1.6256	0.438627	0.936721	0.830629	0.840044	1.42365	1.74598	0.694633	0.762352	0.61133	1.95206	3.54569	1.13983	0.809542	0.491783	high
TCGA-DD-A113	6.64384	0	1.84729	2.65073	2.35421	2.31723	1.62158	3.04846	1.35108	2.05207	1.33031	1.18959	2.51689	3.79198	0.84574	1.36589	2.34249	3.18186	2.81865	1.88015	1.58626	0.713018	high
TCGA-2Y-A9GT	4.44932	1	1.08532	0.669249	1.63549	1.11343	0.755218	1.28945	0.482565	0.629669	0.709385	1.76597	1.15576	1.70646	0.857725	0.524833	1.06442	1.97533	0.179372	1.89014	1.00524	-0.0552673	low
TCGA-DD-A39X	4.6411	1	1.55231	0.540571	2.1611	1.3817	1.08359	2.81564	0.956394	0.728781	0.685838	0.443178	0.970331	1.48334	0.504174	0.443416	1.09029	2.90786	4.15924	1.97632	1.17183	0.337199	low
TCGA-DD-AACU	4.29315	0	1.93084	1.00837	3.19588	2.07918	1.11428	2.2831	0.735253	1.0398	0.836367	2.06733	1.63993	2.21335	0.695204	0.81695	1.23543	2.43035	3.21641	1.92091	0.709227	0.945254	high
TCGA-WX-AA47	1.52329	1	0.782236	1.19487	1.94434	1.07855	1.07006	1.17803	0.630019	0.583121	0.700417	0.197422	0.922174	1.57113	0.365906	0.810973	0.631106	2.84693	0.326322	1.32788	0.817974	0.0618729	low
TCGA-DD-A3A4	1.67671	1	0.591346	0.422242	1.29407	0.829793	0.511719	1.15468	0.348733	0.537164	0.610703	0.137048	0.608681	1.11165	0.339327	0.436719	0.451549	0.948269	3.37593	0.604801	0.466721	0.530335	high
TCGA-DD-A73F	2.9726	0	2.16292	1.6022	2.55168	2.124	1.83815	2.45132	1.32783	1.44484	1.47859	1.93604	2.16049	3.39282	1.13858	1.48385	1.6541	3.34587	0.24732	2.36262	1.74012	0.367527	high
TCGA-DD-A4NN	2.46301	1	2.03964	3.06209	3.94386	2.41638	2.2759	4.0231	1.66657	2.16915	2.12129	0.330751	2.02243	3.91297	1.09097	1.3739	2.83481	4.20511	5.36691	3.06951	1.59954	0.622429	high
TCGA-DD-AAEI	4.19452	0	2.05297	1.22775	2.64716	2.46382	1.20581	2.81443	1.58614	1.4525	1.43113	1.64777	1.96786	2.06437	0.958318	1.18266	1.49201	3.0971	0.265888	2.41507	1.65969	1.01958	high
TCGA-UB-AA0V	0.860274	0	0.490702	0.343862	1.48531	0.745057	0.41731	0.708129	0.255378	0.372482	0.339739	1.04402	0.541952	0.849465	0.402098	0.309914	0.950623	1.05352	1.04909	1.42282	0.469068	0.34886	low
TCGA-DD-AADO	1.2411	0	2.22065	0.700951	3.86219	1.26235	1.57775	2.54862	1.8395	0.830989	0.874484	0.768404	0.584456	1.68136	0.551579	0.867516	1.15335	4.38513	1.03438	1.87936	0.699545	0.292918	low
TCGA-DD-AAVY	5.39726	0	0.406577	0.499653	1.27589	0.556874	0.535087	1.25602	0.200784	0.441732	0.400517	0.242087	0.6731	0.970906	0.382681	0.309511	0.668464	1.36574	4.43101	1.26839	0.523941	0.447802	high
TCGA-FV-A3R3	1.00274	1	0.675729	0.518343	1.01143	0.865695	0.507508	0.995624	0.36859	0.470033	0.503716	1.06366	0.579228	1.32748	0.311418	0.398442	0.499042	1.11151	3.0176	0.6159	0.542398	0.511766	high
TCGA-DD-A4NS	6.72877	1	0.925633	0.918514	1.99114	1.09512	0.6652	1.27529	0.511866	0.84723	0.535522	1.33921	0.838775	1.78511	0.62444	0.533249	0.958672	1.71548	2.76179	1.10696	0.894943	0.149618	low
TCGA-MI-A75H	2.04658	0	1.05727	1.06084	1.99551	1.1302	1.02495	1.76498	0.606984	0.61983	0.778386	0.145244	1.15815	1.74343	0.447341	0.565377	0.930672	2.65922	1.729	1.87024	1.07442	-0.10368	low
TCGA-UB-A7MC	1.36986	0	2.51914	2.73189	3.91667	2.22765	2.10255	3.43635	1.39587	2.05062	1.46925	0.775744	2.33044	4.42556	1.6775	2.11356	2.01453	3.55668	0.90474	3.20941	2.37093	-1.37709	low
TCGA-FV-A4ZQ	0.0328767	0	2.81294	2.26866	4.05515	3.25449	2.45164	3.90991	2.18296	2.34404	2.74405	0.608724	3.31237	4.51601	1.40051	2.39259	3.14032	4.86881	3.65966	2.22994	1.77268	2.56446	high
TCGA-DD-AAEG	1.96986	0	1.31574	1.76162	1.59196	1.65266	0.995169	2.44679	0.706229	1.17117	1.18939	0.551378	2.11736	2.38527	0.385186	0.715029	1.11074	3.11148	1.45052	1.60956	0.887822	0.408974	high
TCGA-DD-AAD5	3.68493	0	2.25465	2.44044	4.44514	2.65739	2.46531	3.56882	2.51452	2.07631	2.13316	1.95831	2.23514	4.10554	1.15276	1.86376	2.0991	4.89215	3.37434	2.29684	3.04525	0.874891	high
TCGA-K7-A5RG	1.42192	0	2.64925	1.82233	3.3444	2.90925	1.74589	3.15171	1.3382	2.43133	2.01508	2.12597	2.53148	3.96196	1.66279	1.9599	2.54638	3.71401	1.84502	2.89897	2.09822	0.767739	high
TCGA-XR-A8TD	2.82192	0	2.6678	1.6827	4.51925	2.71369	2.189	4.0221	2.19963	2.26938	2.34866	1.67021	2.35701	3.70216	1.67058	2.16542	2.28895	4.2814	0.494088	2.21565	2.09298	0.758882	high
TCGA-DD-AACY	3.9726	0	0.557974	0.530107	1.07393	0.857898	0.422414	0.824611	0.287887	0.493418	0.486397	0.431676	0.609853	1.02308	0.323579	0.381167	0.40076	1.29717	2.13802	0.782413	0.563151	0.356767	low
TCGA-KR-A7K7	2.60548	0	2.64449	2.01785	4.63394	2.58011	2.69854	3.56897	2.16107	2.03855	1.72344	1.31567	2.1244	3.24842	1.23804	1.72592	2.06831	5.10658	2.42394	2.66425	2.53635	0.802986	high
TCGA-G3-A25Y	1.23836	1	3.07152	2.13942	4.55344	2.86185	2.50369	3.99529	1.99702	1.84375	1.98523	1.72142	1.88877	4.01908	1.92133	1.77588	2.7815	4.19253	4.74462	3.02621	1.68097	0.919907	high
TCGA-K7-AAU7	0.983562	0	2.54738	2.09962	3.472	2.56732	1.39901	2.07459	1.65613	2.12209	2.53372	3.00553	2.75394	3.44929	1.44743	1.64946	1.89432	3.52745	3.67458	1.8158	1.91332	2.13403	high
TCGA-BC-A3KF	0.0219178	0	1.88037	1.13561	2.51208	2.06811	1.0522	2.3659	1.3484	0.745874	0.951564	2.0632	1.77348	2.92365	0.844449	0.675677	1.78111	3.02383	1.27882	2.24425	0.769893	0.77589	high
TCGA-2Y-A9H2	4.74247	0	2.95911	2.53645	2.38712	3.32665	1.4874	2.43053	1.52865	1.7921	1.79539	4.4691	1.49693	3.62715	2.23596	1.04958	2.29262	3.26695	3.0108	2.09894	2.46679	0.651857	high
TCGA-DD-AAW3	4.47397	0	0.900589	0.756422	1.41742	0.986141	0.876661	1.40492	0.402346	0.551585	0.483296	0.124513	0.819107	1.42408	0.36279	0.450419	0.736251	1.65847	0.464595	1.66231	0.771683	-0.361476	low
TCGA-ED-A82E	1.11781	0	1.11731	0.846639	1.60457	0.713311	0.720278	0.720818	0.480484	0.620025	0.425722	4.36418	0.670254	1.33498	0.518256	0.493892	1.52723	1.37728	1.43151	1.92857	0.923064	0.667176	high
TCGA-DD-A4NP	9.06301	0	0.321396	0.199771	1.17699	0.318643	0.269031	0.507275	0.142317	0.223849	0.198902	0.178487	0.38214	0.475546	0.299652	0.258667	0.324379	0.889302	0.381437	1.25376	0.415106	-0.247668	low
TCGA-G3-A6UC	1.83836	0	1.1254	0.837865	1.7974	1.03103	0.538284	0.943954	0.33745	0.857634	0.614509	0.165587	0.895323	1.24396	0.479969	0.740752	0.635195	1.48599	0.14078	1.03324	0.748291	-0.162135	low
TCGA-DD-AAW1	5.44932	0	0.854384	0.665833	2.21336	0.698875	0.410533	0.960796	0.207129	0.371415	0.253598	1.12699	0.659104	1.00049	0.379343	0.332495	0.547835	1.03273	0.17886	1.14125	0.552869	-0.509913	low
TCGA-DD-A118	9.41644	0	1.78297	1.52979	1.98126	1.6855	0.91923	1.90473	0.92874	0.980842	0.756243	0.867099	1.15571	2.33547	0.587403	0.729298	1.13816	2.66115	1.63409	1.60864	0.82335	0.0196093	low
TCGA-DD-AADA	3.37808	0	0.587353	1.01124	2.13092	0.975488	0.481771	1.20158	0.512381	0.503146	0.467084	0.226427	0.579597	1.36888	0.361774	0.623952	0.423963	1.84103	3.30172	0.548891	0.392136	0.311165	low
TCGA-ED-A66Y	0.810959	1	2.25619	2.6368	2.48278	2.58509	1.50287	3.04827	1.97996	1.6078	2.50878	0.614231	2.8397	4.11004	1.41601	1.73739	2.5427	3.20319	2.29898	2.38728	1.85934	1.25469	high
TCGA-DD-AAE3	1.55068	0	0.491922	0.281702	2.14686	0.492375	0.388557	1.18131	0.25873	0.295017	0.26892	0.836125	0.399829	0.543948	0.262177	0.295974	0.617527	1.68443	0.291211	1.79227	0.427434	-0.346942	low
TCGA-G3-AAV6	0.178082	1	3.2054	2.58119	4.91792	2.47832	3.24941	5.33147	2.77062	2.86334	2.69813	1.34147	1.856	4.15075	1.56671	1.94346	3.25926	5.21781	5.48158	3.53479	2.36095	0.808326	high
